# Supplementary material for: Effect of Extending the Duration of Prequit Treatment With Varenicline on Smoking Abstinence: A Randomized Clinical Trial
Source: PubMed Central journal article supplement (PMC9652761; doi:10.1001/jamanetworkopen.2022.41731), 2022-11-11
Supplement: jamanetwopen-e2241731-s001.pdf [file jamanetwopen-e2241731-s001.pdf]

1 **Trial protocol/Statistical Analysis Plan**

2

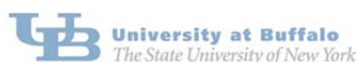
**University at Buffalo Institutional Review Board (UBIRB)**

Office of Research Compliance | Clinical and Translational Research Center Room 5018

875 Ellicott St. | Buffalo, NY 14203

UB Federalwide Assurance ID#: FWA00008824

3

4

5

6

7

8

**Complete Research Protocol (HRP-503)**  
**HRP-503-Protocol-EVarQuit-Rev-2020-06-30.docx**
8 **Table of Contents**

|    |                                                                           |    |
|----|---------------------------------------------------------------------------|----|
| 9  | Template Instructions .....                                               | 1  |
| 10 | 1.0 Objectives .....                                                      | 3  |
| 11 | 2.0 Scientific Endpoints.....                                             | 4  |
| 12 | 3.0 Background .....                                                      | 4  |
| 13 | 4.0 Study Design .....                                                    | 6  |
| 14 | 5.0 Local Number of Subjects .....                                        | 6  |
| 15 | 6.0 Inclusion and Exclusion Criteria .....                                | 7  |
| 16 | 7.0 Vulnerable Populations .....                                          | 9  |
| 17 | 8.0 Eligibility Screening.....                                            | 10 |
| 18 | 9.0 Recruitment Methods .....                                             | 10 |
| 19 | 10.0 Procedures Involved .....                                            | 12 |
| 20 | 11.0 Study Timelines.....                                                 | 22 |
| 21 | 12.0 Setting.....                                                         | 22 |
| 22 | 13.0 Community-Based Participatory Research.....                          | 23 |
| 23 | 14.0 Resources and Qualifications .....                                   | 24 |
| 24 | 15.0 Other Approvals .....                                                | 26 |
| 25 | 16.0 Provisions to Protect the Privacy Interests of Subjects.....         | 26 |
| 26 | 17.0 Data Management and Analysis .....                                   | 27 |
| 27 | 18.0 Confidentiality.....                                                 | 29 |
| 28 | A. Confidentiality of Study Data .....                                    | 29 |
| 29 | B. Confidentiality of Study Specimens.....                                | 31 |
| 30 | 19.0 Provisions to Monitor the Data to Ensure the Safety of Subjects..... | 31 |
| 31 | 20.0 Withdrawal of Subjects .....                                         | 33 |
| 32 | 21.0 Risks to Subjects.....                                               | 34 |
| 33 | 22.0 Potential Benefits to Subjects .....                                 | 36 |
| 34 | 23.0 Compensation for Research-Related Injury.....                        | 36 |
| 35 | 24.0 Economic Burden to Subjects.....                                     | 36 |
| 36 | 25.0 Compensation for Participation .....                                 | 36 |
| 37 | 26.0 Consent Process.....                                                 | 38 |
| 38 | 27.0 Waiver or Alteration of Consent Process .....                        | 41 |
| 39 | 28.0 Process to Document Consent .....                                    | 41 |
| 40 | 29.0 Multi-Site Research (Multisite/Multicenter Only) .....               | 42 |
| 41 | 30.0 Banking Data or Specimens for Future Use .....                       | 42 |
| 42 | 31.0 Drugs or Devices .....                                               | 43 |
| 43 | 32.0 Humanitarian Use Devices .....                                       | 44 |

44

45

46 **Template Instructions**

47 **Sections that do not apply:**

- 48 • In several sections, the addition of checkboxes for **Not Applicable** have been added to the template as  
49 responses.
- 50 ○ If an N/A checkbox is present, select the appropriate justification from the list.  
51 ○ If an N/A checkbox is not present, or if none of the existing checkboxes apply to your  
52 study, you must write in your own justification.
- 53 • In addition:
- 54 ○ For research where the only study procedures are records/chart review: Sections 19, 20,  
55 22, 23, 24, 25, 31, and 32 do not apply.  
56 ○ For exempt research: Sections 31 and 32 do not apply.

57  
58 **Studies with multiple participant groups:**  
59

- 60 • If this study involves multiple participant groups (e.g. parents and children), provide information in  
61 applicable sections for each participant group. Clearly label responses when they differ. For example:

62 Response:

63 Intervention Group:64  
65 Control Group:  
6667 **Formatting:**

- 68 • Do not remove template instructions or section headings when they do not apply to your study.  
69 If you are pasting information from other documents using the “Merge Formatting” Paste option will maintain  
70 the formatting of the response boxes.

71 **Amendments:**

- 72 • When making modifications or revisions to this and other documents, use the **Track Changes** function in  
73 Microsoft Word.  
74 • Update the version date or number **on Page 3**.

75 **PROTOCOL TITLE:**76 *Include the full protocol title.*

77 Response:

78 EVarQuit: Extinguishing cigarette smoking via extended pre-quit varenicline

79 **PRINCIPAL INVESTIGATOR:**80 *Name*81 *Department*82 *Telephone Number*83 *Email Address*

84 Response:

85 Larry W. Hawk, Jr., PhD  
86 Department of Psychology  
87 716-645-0192  
88 [lhawk@buffalo.edu](mailto:lhawk@buffalo.edu)

88 **VERSION:**

89 *Include the version date or number.*

90 Response: 2020-06-30

## 91 **GRANT APPLICABILITY:**

92 *Indicate whether this protocol is funded by a grant (e.g. NIH, foundation grant). For a grant with multiple*  
 93 *aims, indicate which aims are covered by this research proposal.*

94 *NOTE: This question does not apply to studies funded by a sponsor contract.*

95  *Include a copy of the grant proposal with your submission.*

96 Response: All aims of NCI/NIH grant CA206193 are covered by this proposal.

97  App00-Grant-ExtinctionR01A1-NIHCompleteGrantDownload-2016-03-07.pdf.

98

## 99 **RESEARCH REPOSITORY:**

100 *Indicate where the research files will be kept, including when the study has been closed. The repository*  
 101 *should include, at minimum, copies of IRB correspondence (approval, determination letters) as well as*  
 102 *signed consent documents. This documentation should be maintained for 3 years after the study has been*  
 103 *closed.*

104 Response:

105 *Location:* 3<sup>rd</sup> floor, Diefendorf Hall in locked cabinets within locked offices

106 *Address:* 311 Diefendorf Hall, S Campus, University at Buffalo

107 *Department:* Psychology

108

## 109 **1.0 Objectives**

110 *1.1 Describe the purpose, specific aims, or objectives of this research.*

111 Response:

112 Aim 1: Evaluate the impact of extended pre-quit varenicline therapy on smoking cessation.

113 Aim 2: Evaluate the impact of extended pre-quit varenicline therapy on smoking behavior and  
 114 related processes prior to cessation.

115 Aim 3: Evaluate the degree to which changes in pre-quit smoking behavior (Aim 2) truly account  
 116 for, or mediate, the impact of extended pre-quit varenicline on smoking cessation (Aim 1).

117 **UPDATE 2020-06-30 – OPTIONAL SALIVA SAMPLE FOR GENETIC ANALYSIS:** As detailed in  
 118 our administrative supplement request (EvarQuit Admin Supp Application – 2020-04-21.pdf), “...to  
 119 enhance this R01’s ability to inform and link to precision medicine approaches, we propose to evaluate the  
 120 role of variants in two families of genes previously associated with varenicline concentrations, nausea,  
 121 and/or smoking cessation” (select SNPs related to drug transport [OCT2] and nicotinic receptor subunits  
 122 [CHRNA4/CHRNA2]).

123 *1.2 State the hypotheses to be tested, if applicable.*

124 *NOTE: A hypothesis is a specific, testable prediction about what you expect to happen in your study*  
 125 *that corresponds with your above listed objectives.*

126 Response:

127 We hypothesize that extended run-in varenicline will improve bio-verified continuous abstinence  
 128 rates at end-of-treatment and at long-term follow-up (6- months), compared to the standard run-  
 129 in. Because extended pre-quit treatment may be particularly helpful for women (Becker et al.,  
 130 2008; Hawk et al., 2012), the study is powered to evaluate moderation of treatment by gender.

131 Consistent with extinction theory, we predict that the extended run-in group will exhibit greater  
 132 pre-quit reductions in smoking (cigarettes per day, CO) than the standard run-in group. Effects  
 133 on other biological (cotinine, total nicotine exposure), self-report (subjective effects of smoking,  
 134 craving, withdrawal, nausea, expectancies), and behavioral (laboratory reinforcement task)  
 135 outcomes will also be evaluated to better characterize potential treatment mechanisms.

136 The extinction model predicts that the cessation benefits of extended run-in varenicline will be  
 137 explained by greater pre-quit reductions in smoking. We will also test whether this mechanism is  
 138 particularly strong among women (i.e., moderated mediation).

## 139 2.0 Scientific Endpoints

140

141 *2.1 Describe the scientific endpoint(s), the main result or occurrence under study.*

142

143 *NOTE: Scientific endpoints are outcomes defined before the study begins to determine whether the*  
 144 *objectives of the study have been met and to draw conclusions from the data. Include primary and*  
 145 *secondary endpoints. Some example endpoints are: reduction of symptoms, improvement in quality of life,*  
 146 *or survival. Your response should **not** be a date.*

147

Response:

148 Our primary outcome measure (for Aims 1 and 3) is bio-verified self-report of continuous abstinence from  
 149 smoking during the final four weeks of treatment (Weeks 8-11 post-quit, the typical primary outcome in  
 150 varenicline trials; e.g., Gonzales et al., 2006; Hawk et al., 2012; Jorenby et al., 2006). Continuous  
 151 abstinence will also be evaluated for weeks 8-26 and 8-26 post-quit (with bio-verification at 6M visits,  
 152 respectively). Secondary clinical outcomes include rates of side effects and pill count measures of  
 153 adherence.

154 Our primary mediator of interest will be smoking behavior (cigarettes smoked per day, or CPD) during the  
 155 pre-quit phase of the study (Weeks -5 through -1), as reported during daily morning EMA assessments.  
 156 Secondary measures for understanding the causal process include expired-air CO and varenicline levels  
 157 will also be examined, as will laboratory measures of reinforcement, craving, withdrawal, subjective effects  
 158 of smoking, and nausea.

## 159 3.0 Background

160 *3.1 Provide the scientific or scholarly background, rationale, and significance of the research based on*  
 161 *the existing literature and how it will contribute to existing knowledge. Describe any gaps in*  
 162 *current knowledge. Include relevant preliminary findings or prior research by the investigator.*

163 Response: Cigarette smoking remains the leading preventable cause of death in the US, killing an estimated  
 164 480,000 people per year and linked to 1 in 3 cancer deaths. The 2014 Surgeon General's Report (US  
 165 DHHS, 2014) suggests that the consequences of smoking are even worse than previously thought. Cigarette  
 166 design changes have increased the risk smoking poses for lung cancer, and smoking is now linked to an  
 167 even larger number of cancers (including colorectal and liver). Moreover, emerging evidence suggests that  
 168 smoking increases the risk for cancer recurrence and treatment toxicity (US DHHS, 2014).

169 Although quitting smoking markedly lowers disease risk and improves health (US DHHS 2014), there are a  
 170 limited number of effective smoking cessation therapies, and long-term cessation rates remain low. Three  
 171 evidence-based pharmacotherapies are available for smoking cessation in the US: nicotine replacement  
 172 therapy (NRT), bupropion, and varenicline. Both NRT and bupropion approximately double the odds of  
 173 long-term cessation (6 months or more) when compared to placebo (e.g., Fiore et al., 2008). Varenicline,  
 174 approved by the FDA in 2006, triples the odds of quitting compared to placebo and outperforms single-  
 175 NRT and bupropion (for a review, see Cahill et al., 2013; c.f. Baker et al., 2016). Nevertheless, long-term  
 176 abstinence rates remain low, with only 1 in 4 varenicline users smoke free 6+ months after quitting (Cahill  
 177 et al., 2013).

178 Given the tremendous costs of smoking and the benefits of quitting, the development of cessation  
 179 approaches with greater efficacy is critical. The typical drug discovery path is unlikely to generate an  
 180 answer. Despite enormous investments in evaluating numerous medications in the decade since varenicline

181 reached the US market, “no new smoking cessation aid is nearing...FDA approval” (e.g., Rigotti, 2015).  
182 Certainly, there is nothing looking likely to do better than the treatments we already have – but that is  
183 exactly what we need.

184 To advance clinical practice, we build on basic research, theory, and compelling preliminary data from  
185 small-scale RCTs to evaluate a treatment approach that appears likely to beat our current “best in class”  
186 cessation approach, standard varenicline therapy. We take the perspective that improved understanding and  
187 targeting of treatment mechanisms is the best path forward (e.g., Kraemer et al. 2006; MacKinnon, 2008;  
188 Rigotti, 2015; TRIP, 1988). Varenicline binds to the alpha-4 beta-2 receptor subunit of nicotinic  
189 acetylcholine receptors (nAChR), exerting effects as both a partial nicotine agonist, by stimulating  
190 dopamine release, and as an antagonist, by blocking the binding of nicotine to this site. In clinical trials,  
191 varenicline robustly decreased post-cessation smoking cravings and satisfaction with cigarettes during  
192 lapses (e.g., Gonzales et al., 2006; Jorenby et al., 2006). For varenicline, which is typically administered for  
193 a week prior to quitting and is hypothesized to work partly by reducing the reinforcing effects of smoking  
194 (e.g., Rollema et al., 2007), it is also critical to examine pre-quit treatment mechanisms (e.g., Cummings &  
195 Mahoney, 2008; Fiore et al., 2008; Hawk et al., 2015; Rose, 2009, 2011; Rose & Levin, 1991).

196 From a learning perspective, when favorable consequences of a behavior are removed, the behavior  
197 decreases in frequency, or is extinguished. Consistent with the hypothesis that varenicline diminishes the  
198 reinforcing value of smoking in humans, varenicline dose-dependently reduces self-administration of  
199 nicotine in rats (O’Connor et al., 2010; Rollema et al., 2007). For varenicline to promote extinction in  
200 human smokers, they must continue smoking while taking the drug in order to learn that the reinforcing  
201 effects are attenuated. The typical one-week run-in period for varenicline is likely insufficient, as extinction  
202 requires numerous “trials” (see Bouton et al. 2012) and does not generalize well from one situation or  
203 context to another (Bouton, 2000, 2004a; Collins & Brandon, 2002; see also Conklin & Tiffany, 2002).

204 How can we effectively promote such extinction in smokers? The pioneering work of Rose et al. (1988)  
205 with the nicotine patch suggested a straightforward method: extend the pre-quit run-in medication period to  
206 allow greater repeated natural exposure to attenuated reinforcement from smoking prior to the target quit  
207 date (TQD). We recently tested this approach in small-RCTs of both bupropion (Hawk et al., 2015 /Prelim  
208 Study 1) and varenicline (Hawk et al., 2012 / Prelim Study 2; see also Ashare et al., 2012, Gass et al.,  
209 2012); treatment-seeking smokers were randomized to either a Standard run-in group (3 weeks of placebo,  
210 1 week of pre-TQD medication) or an Extended run-in group (4 weeks of pre-TQD medication); all  
211 participants received counseling and typical regimens of post-TQD medication. Hajek et al. (2011)  
212 conducted an independent but very similar small-scale RCT of varenicline. In all three pilot RCTs, the  
213 results were consistent with an extinction hypothesis: the extended run-in resulted in greater reductions in  
214 smoking rate (and tended to reduce craving and smoking satisfaction) prior to the TQD and improved  
215 abstinence rates at short-term follow-up. (In both Hawk et al. studies, there was evidence that the extended  
216 run-in had a greater impact among women more than men; Hajek et al. did not examine gender effects).  
217 Overall, the results of these three studies are promising, particularly because the control condition was an  
218 approved cessation medication; in the case of varenicline, the extended run-in beat the current “best in  
219 class” treatment (standard run-in varenicline). However, the studies were limited by their small sample  
220 sizes (Ns=60-100) and short-term follow-up (4 weeks – 3 months).

221 The proposed study takes the next critical step in evaluating the degree to which extended-run in  
222 varenicline will set a new efficacy standard in smoking cessation, a large-scale RCT with long-term follow-  
223 up. Thus, the primary significance of the proposed RCT is that it will, if successful, provide a marked  
224 advance in the treatment of cigarette smoking, the leading preventable cause of death in the US. Moreover,  
225 it would do so at far less cost and far more quickly than traditional pharmaceutical development pathways  
226 (see Chong & Sullivan, 2007; Collins, 2011). Although every innovation in treatment faces challenges in  
227 bridging the science-practice gap, the proposed treatment and RCT are designed to facilitate and inform  
228 widespread dissemination and implementation (see the Introduction to the revision), further enhancing the  
229 significance of the work.

230 The proposed RCT will also evaluate the mechanisms by which extended run-in varenicline exerts  
231 its clinical effects. This addresses a critical split in our field and gap in our knowledge – whereas most  
232 varenicline RCTs have been weak in testing mechanisms with anything other than retrospective self-report  
233 at clinic visits (e.g., Gonzales et al., 2006; Jorenby et al., 2006; Ebbert et al., 2015), most laboratory

234 behavioral pharmacology studies of varenicline mechanisms have focused on participants who are not  
 235 actively trying to quit (Mostchman et al., 2014). As in our pilot RCT with varenicline (Hawk et al., 2012;  
 236 Prelim Study 2), we will obtain biochemical measures of changes in smoking behavior and real-world, real-  
 237 time measures of smoking reinforcement and related constructs via ecological momentary assessment  
 238 (EMA). In addition, we have adapted laboratory paradigms from behavioral pharmacology to more  
 239 thoroughly evaluate changes in reinforcement in the pre-quit period (see Prelim Study 4). Most  
 240 importantly, we will use these data to directly evaluate the degree to which extinction of reinforcement  
 241 accounts for, or mediates, the effect of extended run-in varenicline therapy. Our evaluation of putative  
 242 treatment mechanisms will both advance knowledge and provide clearer targets for subsequent treatment  
 243 development and personalization (e.g., Kraemer et al., 2006). Additional details are provided in the  
 244 attached grant application and administrative supplement application.

245 3.2 *Include complete citations or references.*

246 Response: All references are included in the attached grant application (App00) and administrative  
 247 supplement application.

248

## 249 4.0 Study Design

250 4.1 *Describe and explain the study design (e.g. case-control, cross-sectional, ethnographic,*  
 251 *experimental, interventional, longitudinal, observational).*

252 Response: This study, which will be conducted  
 253 over a 5-year period, will employ a two-group,  
 254 balanced, randomized, double-blind, placebo-  
 255 controlled parallel-group design. The research  
 256 design is summarized in the Figure at right.

257

258

259

260

261

262

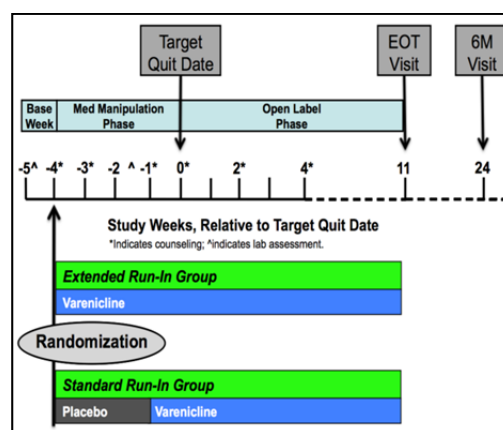

## 263 5.0 Local Number of Subjects

264 5.1 *Indicate the total number of subjects that will be enrolled or records that will be reviewed locally.*

265 Response: Participants will be 320 treatment-seeking adult smokers (160 female).

266

267 **UPDATE 2020-06-30 – OPTIONAL SALIVA SAMPLE FOR GENETIC ANALYSIS:** An optional  
 268 saliva sample for genetic analysis will be obtained from up to 200 of the 320 participants.

269 5.2 *If applicable, indicate how many subjects you expect to screen to reach your target sample (i.e. your*  
 270 *screen failure rate).*

271 Response: To accrue 320 ITT participants across 44 months, we have developed conservative projections  
 272 for accruing 9 ITT participants per month: screening approximately 55 potential participants by phone each  
 273 month, with 50% (28) of those eligible after phone prescreen, 50% (14) of those attending the intake visit,  
 274 75% (10) of those at intake consenting and remaining eligible after full screening, and 90% (9) of those  
 275 eligible ultimately achieve ITT status.

276 **2019-11 Update (approved/implemented early 2020-01):** In recent months, we have extensively  
 277 reviewed our accrual process. Accrual flow projections that we made in the grant proposal (e.g., 50%  
 278 eligible on phone screen, 75% eligible at intake visit) have been accurate, with one critical exception. We

279 predicted that we would lose no more than 10% of prospective participants between the intake visit and  
 280 beginning treatment 1-2 weeks later (and counting as one of our 320 intent-to-treat, or ITT, participants). In  
 281 reality, we have lost more than twice that many people (21%) at this stage. Importantly, the loss of potential  
 282 participants between the intake visit and ITT disproportionately affects the representation of racial/ethnic  
 283 minorities. That is, participant loss at this stage is 36% for people from minorities compared to 15% for  
 284 non-Hispanic Caucasians.

285 In an effort to improve the proportion of intake-eligible participants who ultimately achieve ITT status,  
 286 we made the following changes with the 2019-11 IRB modification:

287 1. Increase remuneration for the lab visits (see Section 26.1), which provide no clinical benefit and last  
 288 longer than clinic visits.

289 2. Eliminate the 50% adherence requirement for the device-initiated assessments in the Ecological  
 290 Momentary Assessment (EMA; see section 11.1).

291

292 5.3 *Justify the feasibility of recruiting the proposed number of eligible subjects within the anticipated*  
 293 *recruitment period. For example, how many potential subjects do you have access to? What*  
 294 *percentage of those potential subjects do you need to recruit?*

295 Response: Roughly 20% of adults in NY smoke, and most smokers say they would like to quit. Thus, there  
 296 is a large number of eligible participants in WNY. Indeed, our success enrolling 12 ITTs/month in a more  
 297 demanding and restrictive trial (see Lerman et al., 2015) from 2011-2015 supports the feasibility of meeting  
 298 our accrual target.

299

## 300 6.0 Inclusion and Exclusion Criteria

301 6.1 *Describe the criteria that define who will be **included** in your final study sample.*

302 *NOTE: This may be done in bullet point fashion.*

303 Response:

- 304 • Baseline smoking rate and CO:
  - 305 ○ Prior to 2019-11 modification: Smoking at least 10 cigarettes per day for the past 6
  - 306 months and CO >7 at intake.
  - 307 ○ Beginning with the **2019-11 modification**: Smoking at least 5 cigarettes per day (CPD)
  - 308 for the past 6 months. (In November 2019, we noted that smoking 5-9 was the most
  - 309 single common reason for exclusion at phone screen. This was particularly notable for
  - 310 people from racial and ethnic minority groups [e.g., 2% of phone screens for non-
  - 311 Hispanic whites vs. 12% of phone screens for Black/African American participants] In
  - 312 light of the growing number of daily smokers who smoke <10 CPD [e.g., Jamal et al.,
  - 313 MMWR, 2018) and our desire to increase the diversity and representativeness of the
  - 314 sample, we reduced the CPD criterion from 10 to 5. With lighter smokers, the expired air
  - 315 CO criterion would be less accurate/reliable for indexing daily smoking; therefore, it was
  - 316 eliminated.) Once the modification is approved, we will contact people who were
  - 317 previously deemed ineligible only because they smoked 5-9 CPD and offer to re-screen if
  - 318 they are interested.
- 319 • At least moderately motivated to quit smoking (3 or 4 on phone screen; modified MTSS) and
- 320 intention to make a quit attempt with varenicline 1 month after treatment begins.
- 321 • Planning to remain in western NY during the study period (intake)
- 322 • Willing to use varenicline and to refrain from other cessation treatments and tobacco products
- 323 during the study period. (intake)
- 324 • Age 18-70 years. (phone screen)
- 325 • Fluent English speaker (clinical judgment)
- 326 • Capable of providing informed consent, which includes compliance with the requirements and
- 327 restrictions listed in the combined consent and HIPAA form (clinical judgment)

- 328 • To be ITT, the participant must complete Lab Visit 1 and meet minimal completion rate for real-
- 329 world (EMA) assessments (detailed below; see also Section 6.2).
- 330 • Normal or corrected vision required for study.

331 6.2 Describe the criteria that define who will be **excluded** from your final study sample.

332 NOTE: This may be done in bullet point fashion.

333 Response:

- 334 • Use of other tobacco products, including e-cigarettes, in past 7 days (phonescreen)
- 335 • Use of smoking cessation medication, including nicotine replacement therapy, in the past 14 days?
- 336 (phonescreen)
- 337 • Prior allergy/hypersensitivity to varenicline (phone screen)
- 338 • Pregnancy (phone screen, plus Urine at Intake)
- 339 • Substance use:
  - 340 ○ Alcohol: *At phone screen*: “Daily or almost daily” report of drinking 5 (4 for women) or
  - 341 more drinks a day in the past year (Nida Quick Screen after explaining drinks per day).
  - 342 *Intake*: AUDIT score > 15 at intake, suggestive of alcohol dependence and warranting
  - 343 treatment; for those with scores between 8 and 15, we will advise reducing drinking;
  - 344 Babor et al., 2001; see also Rubinsky et al 2010).
  - 345 ○ Medical treatment in past 3 months, including *Suboxone (buprenorphine) and methadone*
  - 346 (*at phone screen*)
  - 347 ○ Using a combination of the NIDA-modified ASSIST (4-26 = moderate risk; 27+ = high
  - 348 risk) and urine toxicology screen (both at intake):
    - 349 ▪ Cannabis: ASSIST=27+ (tox screen not used)
    - 350 ▪ Cocaine: ASSIST=7+ OR positive tox screen
    - 351 ▪ Methamphetamine: ASSIST=7+ OR positive tox screen
    - 352 ▪ Inhalants, hallucinogens: ASSIST score = 7+
    - 353 ▪ Prescription stimulants, sedatives, or sleeping pills:
      - 354 • With prescription, ASSIST 27+
      - 355 • Without prescription, ASSIST 7+
    - 356 ▪ Opioids:
      - 357 • With prescription, ASSIST 27+ (note ineligible if prescription is for
      - 358 buprenorphine or methadone)
      - 359 • Without prescription, ASSIST 7+ OR positive tox screen
- 360
- 361 • Psychiatric:
  - 362 ○ Antipsychotic medications (phone / intake)
  - 363 ○ Lifetime history of schizophrenia or bipolar disorder (phone)
  - 364 ○ Evidence of *current major depression* ( *per* Patient Health Questionnaire (PHQ-9;
  - 365 Kroenke & Spitzer, 2002) score 12+, see Gilbody & McMillan, 2012; Loewe et al, 2004)
  - 366 at intake
  - 367 ○ Past 10 years suicidal ideation / behavior at intake, using slightly more conservative
  - 368 exclusion criteria than in the EAGLES study of neuropsychiatric events when quitting
  - 369 smoking (see Anthenelli et al., 2016), all of the following are exclusionary on the
  - 370 baseline Columbia-Suicide Severity Rating Scale (Posner et al., 2008):
    - 371 ▪ SI without intent (C-SSRS #1, #2, or #3), if any intensity rating (Frequency,
    - 372 Duration, Controllability, Deterrents, or Reasons for Ideation) is > 2.
    - 373 ▪ SI with intent (C-SSRS #4, or #5), regardless of intensity ratings.
    - 374 ▪ Suicidal Behavior (any suicide attempt, interrupted attempt, aborted attempt, or
    - 375 suicide preparatory acts or behavior on the C-SSRS).
- 376 • General Exclusion:
  - 377 ○ Any medical condition, illness, disorder or concomitant medication that compromises
  - 378 participant safety or treatment, as determined by the Principal Investigator and/or Study
  - 379 Physician.



- 380                                   ○ Inability to provide informed consent or complete any of the study tasks as determined by  
381                                   the Principal Investigator and/or Study Physician.

382 6.3 Indicate specifically whether you will include any of the following special populations in your study  
383 using the checkboxes below.

384  
385 **NOTE: Members of special populations may not be targeted for enrollment in your study unless**  
386 **you indicate this in your inclusion criteria.**

387 Response: N/A – We will not include any of the following special populations.

- 388                    Adults unable to consent  
389                    Individuals who are not yet adults (infants, children, teenagers)  
390                    Pregnant women  
391                    Prisoners

392 6.4 Indicate whether you will include non-English speaking individuals in your study. **Provide**  
393 **justification if you will exclude non-English speaking individuals.**

394 *In order to meet one of the primary ethical principles of equitable selection of subjects, non-English*  
395 *speaking individuals may **not** be routinely excluded from research as a matter of convenience.*

396 *In cases where the research is of therapeutic intent or is designed to investigate areas that would*  
397 *necessarily require certain populations who may not speak English, the researcher is required to*  
398 *make efforts to recruit and include non-English speaking individuals. However, there are studies in*  
399 *which it would be reasonable to limit subjects to those who speak English. Some examples include*  
400 *pilot studies, small unfunded studies with validated instruments not available in other languages,*  
401 *studies with numerous questionnaires, and some non-therapeutic studies which offer no direct*  
402 *benefit.*

403 Response: We will *not* include non-English speaking individuals because the study focuses on extensive  
404 self-report measures, including 35 days of daily assessments with electronic reporting, that have not  
405 validated in languages other than English.

## 406 7.0 Vulnerable Populations

407 *If the research involves special populations that are considered vulnerable, **describe the safeguards***  
408 *included to protect their rights and welfare.*

409 *NOTE: You should refer to the appropriate checklists, referenced below, to ensure you have provided*  
410 *adequate detail regarding safeguards and protections. You do not, however, need to provide these*  
411 *checklists to the IRB.*

412  
413 7.1 For research that involves **pregnant women**, safeguards include:

414 **NOTE CHECKLIST: Pregnant Women (HRP-412)**

415 Response:

- 416  N/A: This research does not involve pregnant women.

417 7.2 For research that involves **neonates of uncertain viability or non-viable neonates**, safeguards  
418 include:

419 **NOTE CHECKLISTS: Non-Viable Neonates (HRP-413), or Neonates of Uncertain Viability (HRP-**  
420 **414)**

421 Response:

- 422  N/A: This research does not involve non-viable neonates or neonates of uncertain viability.

423 7.3 For research that involves **prisoners**, safeguards include:

424 **NOTE CHECKLIST: Prisoners (HRP-415)**

425 Response:

426  N/A: This research does not involve prisoners.

427 7.4 For research that involves **persons who have not attained the legal age for consent to treatments or**  
 428 **procedures involved in the research (“children”)**, safeguards include:  
 429 NOTE CHECKLIST: Children (HRP-416)

430 Response:

431  N/A: This research does not involve persons who have not attained the legal age for consent to  
 432 treatments or procedures (“children”).

433 7.5 For research that involves **cognitively impaired adults**, safeguards include:  
 434 NOTE CHECKLIST: Cognitively Impaired Adults (HRP-417)

435 Response:

436  N/A: This research does not involve cognitively impaired adults.

437 7.6 Consider if other specifically targeted populations such as students, employees of a specific firm, or  
 438 educationally or economically disadvantaged persons are vulnerable. **Provide information**  
 439 **regarding their safeguards and protections, including safeguards to eliminate coercion or undue**  
 440 **influence.**

441 Response:

442  N/A This study does not target vulnerable populations.

443

## 444 8.0 Eligibility Screening

445 8.1 Describe **screening procedures** for determining subjects’ eligibility. Screening refers to determining  
 446 if prospective participants meet inclusion and exclusion criteria.

447  Include all relevant screening documents with your submission (e.g. screening protocol, script,  
 448 questionnaire).

449 Response:

450 After obtaining verbal consent, potential subjects will be screened by telephone for eligibility to attend an  
 451 overview and intake visit.

452  [EVQ2CRFs - Initial Screen - 2017-08-02.pdf\(2017-08-02\)](#)

453 The intake will begin with informed consent. Consented participants will complete the following  
 454 assessments: vital signs and CO levels, smoking history, concomitant medication review, baseline side  
 455 effects, urine toxicology screen, urine pregnancy test for women, and brief measures of mood, suicidality,  
 456 depression, and anxiety. A study clinician will carefully review the medical history and complete a focused  
 457 physical examination.

458  Informed consent is App28-InformedConsentWithHIPPA—EvarQuit.

459  Measures are found in:

- 460 ○ [EVQ2CRFs - Intake - Self-Report Measures - 2017-08-02.pdf\(2017-08-02\)](#)
- 461 ○ [EVQCRFs - Intake - Staff Instruments - 2017-08-02.pdf\(2017-08-02\)](#)

462 During the baseline lab visit, participants will complete the laboratory reinforcement task  
 463 (discussed below) and will be trained in completing a baseline week of ecological momentary  
 464 assessments (EMA; discussed below). Participants must attend the baseline lab visit and complete  
 465 at least 40% of baseline week (EMAs) in order to continue in the study. (Participants who do not  
 466 meet these requirements can schedule one additional baseline week.)

467

## 468 9.0 Recruitment Methods

469  **N/A:** This is a records review only, and subjects will not be recruited. NOTE: If you  
 470 select this option, please make sure that all records review procedures and  
 471 inclusion/exclusion screening are adequately described in other sections.

472 9.1 *Describe when, where, and how potential subjects will be recruited.*

473 *NOTE: Recruitment refers to how you are identifying potential participants and introducing them to*  
 474 *the study. Include specific methods you will use (e.g. searching charts for specific ICD code*  
 475 *numbers, Research Participant Groups, posted advertisements, etc.).*

476 Response:

477 We plan to enroll participants from January 2017 through January 2021.

478 Community participants will be recruited primarily via radio and television ads, internet (e.g., Craigslist,  
 479 Facebook), flyers around the community and via email list serves, and newspaper advertisements, as in our  
 480 recent large-scale trial. We also plan to use researchmatch.org, Urban Family Practice, and the Buffalo  
 481 Research Registry.

482 The Urban Family Practice will *send a co-signed letter out to their patients, providing them more*  
 483 *information about the EvarQuit Program. Should a person become interested in the program, they could*  
 484 *call us for more information. Additionally, names and phone numbers of those to whom letters were sent*  
 485 *will be provided to our team. We will call those participants that we have not heard from within 2 weeks of*  
 486 *letter postmark date to see if they received the information (following the attached script). We will only*  
 487 *make two contact attempts by phone to each person.*

488 We will also use I2B2 in UB CTSI to recruit participants from the UBMD medical data base. A letter will  
 489 be sent to the Physician (see attached letter) prior to contacting participants (see attached letter). We will  
 490 not contact prospective participants by phone, allowing them greater control over their participation.

491 The New York State Department of Health has approved of the New York State Smokers Quit Line  
 492 (NYSSQL) sending out letters to smokers in our region who recently contacted the quit line. We will not  
 493 have access to any names or any contact information. We will not be cosigning the letter. Folks who get the  
 494 letter will have the option of contacting us for more information.

495 A project website also allows potential participants to find our information and contact us, if they are  
 496 interested in being screened for our program (see attached screen shots & <http://quitforgoodwny.com/>).

497 9.2 *Describe how you will protect the privacy interests of prospective subjects during the recruitment*  
 498 *process.*

499 *NOTE: Privacy refers to an individual's right to control access to him or herself.*

500 Response: Most importantly, we will recruit via public advertisements so that interested participants self  
 501 identify, and we will only contact participants and collect study data by methods to which they have  
 502 requested/consented. To enhance privacy and confidentiality during the phone screen, all phone screens  
 503 will be conducted from secure offices on the third floor of Diefendorf Hall, and messages will be quite  
 504 general (see phone script overview, App08-01a).

505 9.3 *Identify any materials that will be used to recruit subjects.*

506 *NOTE: Examples include scripts for telephone calls, in person announcements / presentations,*  
 507 *email invitations.*

508  *For advertisements, include the final copy of printed advertisements with your submission. When*  
 509 *advertisements are taped for broadcast, attach the final audio/video tape. NOTE: You may*  
 510 *submit the wording of the advertisement prior to taping to ensure there will be no IRB-required*  
 511 *revisions, provided the IRB also reviews and approves the final version.*

512 Response:

513  EvarQuit Study Facebook Recruitment

514  EVQ Recruitment Letter-Urban Family Practice

- 515  EvarQuit Advertising Flyers- provides several flyer versions for the study.
- 516  Referral Cards
- 517  Website Screen shots- for www.QuitforGoodWNY.com
- 518  Recruitment Letter to Participants from NYSSQL
- 519  App09-01-EvarQuit TV & Radio Advertising 2018-12-13.doc provides the text for radio, craigslist,  
520 and newspaper advertisements.
- 521  App09-02a-I2B2 Physician permission Letter Template ver 032417 - EVarQuit2017-06-01.docx
- 522  App09-02b-I2B2 Recruitment letter to participant template ver 032417 - EvarQuit 2017-06-01.docx
- 523  App09-03– Phone and Letter Script for Prior CPD Ineligible.docx

524

525 **10.0 Procedures Involved**

526 *10.1 Provide a description of **all research procedures or activities** being performed and when they are*  
 527 *performed once a subject is screened and determined to be eligible. Provide as much detail as*  
 528 *possible.*

529 *NOTE: This should serve as a blueprint for your study and include enough detail so that another*  
 530 *investigator could pick up your protocol and replicate the research. For studies that have multiple*  
 531 *or complex visits or procedures, consider the addition of a schedule of events table in in your*  
 532 *response.*

533 Response: Procedures. Study procedures generally follow standard practice and our prior work.

534

535 *Lab visits.* In addition to the measures noted in the table above, the two lab visits include two  
 536 additional procedures, described below. During the baseline lab visit (L1; Week -5), participants will  
 537 complete the laboratory reinforcement task (CBUCC; see below) and will be trained in completing a  
 538 baseline week of EMA assessments (details below). Lab visit 2 (L2; Week -2) is completed in the final  
 539 week of the medication manipulation phase and offers clear experimental data regarding the impact of  
 540 varenicline versus placebo on the laboratory task (CBUCC).

541  For both CBUCC and EMA procedures, see EvarQuit Lab 1 SOP – 2017-09-19.docx.

542  For L2 procedures including the ad-lib period, see EvarQuit Lab 2 SOP – 2019-02-18.docx

543  For questionnaires used at the Lab Visits, see the EVQ2 – CRFs – Lab Visit.pdf.

544

545 *CBUCC*. Participants will be instructed  
 546 to arrive at the lab visits having not smoked  
 547 since midnight; most sessions will be scheduled  
 548 in the morning to provide modest overnight  
 549 abstinence from smoking (expired-air CO must  
 550 be at least 40% lower than the CO obtained at  
 551 intake or the session will be rescheduled).  
 552 During CBUCC (Gass & Tiffany, under review),  
 553 smokers are exposed to a lit cigarette, a cup of  
 554 water, or a portion of highly preferred food (12  
 555 trials each, counterbalanced). These stimuli are  
 556 located behind a movable glass door. On each  
 557 trial, smokers rate their craving in the presence  
 558 of the cue and then indicate the amount of  
 559 money they are willing to spend to gain access  
 560 to the cue. *During the task, they will be video*

561 *recorded. This video recording will be used to examine behavior during the lab task via coding paradigm..*  
 562 Participants are given \$10 at the beginning of the procedure and told they can keep whatever  
 563 amount they do not spend during CBUCC. Participants may spend \$.01 to \$.25 on each trial. The  
 564 more the participants spend, the greater the probability that the door will be unlocked and they  
 565 will be able to sample the cue on that trial (probabilities range from 5% to 95%). At each trial,  
 566 participants are shown the CBUCC choice screen. After deciding how much to spend, participants  
 567 are told to try to open the door. If the door is unlocked, they can sample the cue (1 cigarette puff,  
 568 sip of water, or bite of food).

569 CBUCC generates multiple indices of reinforcement, including self-reported craving, the  
 570 amount of real money paid for the opportunity to puff a cigarette, latency to attempt to open the  
 571 door, and actual consumption (observed puff duration). In contrast to conventional laboratory  
 572 assessments of cigarette choice in which smokers delay smoking a single cigarette in exchange for  
 573 money (e.g., McKee et al., 2012), CBUCC generates multiple indices of smoking motivation and  
 574 reinforcement and does so across numerous trials. Thus, CBUCC produces very reliable estimates  
 575 of these variables within a single laboratory session. Moreover, unlike conventional cigarette  
 576 choice procedures, CBUCC allows us to examine the relative reinforcing value of consumable  
 577 reinforcers.

578 *Ad-Lib Cigarette, Food, and Water Period.* Following CBUCC administration at L2 (not  
 579 L1), we will now offer participants a brief ad-lib consumption period. Typically, participants have  
 580 at least 8 cigarettes left after CBUCC, and there is often leftover food/water from the procedure  
 581 that is typically discarded. Participants will have 15 minutes and can choose how much, if any,  
 582 cigarettes, food, and water they wish to consume. During this period, they will be informed that  
 583 research assistants have tasks to complete in the control room, and that they have 15 minutes to  
 584 consume as much or as little as they wish. Participants will continue to be passively recorded  
 585 during this period. We are expecting to use data from this period (i.e., count of cigarettes smoked,  
 586 weight of food eaten, puff number/puff duration/interpuff interval of cigarettes) as an additional  
 587 naturalistic measure of consumption reinforcement against which to measure the behaviors  
 588 obtained during CBUCC. Based on the average times of L2 observed thus far, we do not expect  
 589 that this will significantly lengthen the session on average from what is described in the consent  
 590 (i.e., 2 hours). If they smoke or eat at all, they will also complete the Subjective Effects  
 591 Questionnaire (same questions answered in CBUCC/on EMA).

#### 592 **UPDATE 2020-06-12 - elimination of lab visits for remaining participants:**

593 The COVID lockdown obviously took a toll on all clinical research, and now we are modestly behind  
 594 in our accrual. Moreover, there is the concern that, as New York slowly reopens, community members  
 595 will be especially wary of trials such as ours because of the many visits to campus. Finally, there's  
 596 always the possibility of additional lockdowns if COVID rebounds in the fall. We have reviewed our  
 597 trial components for opportunities to reduce the number of visits and amount of unnecessary exposure

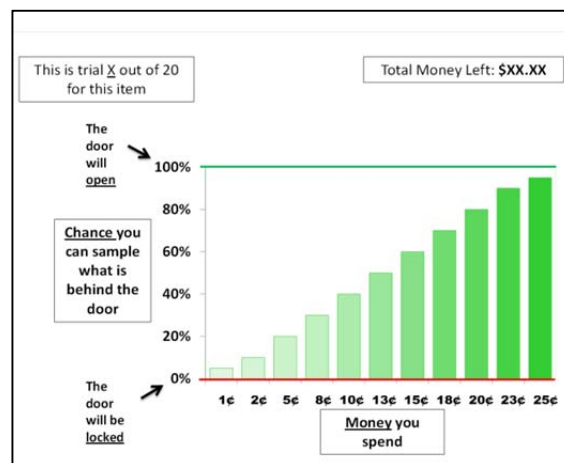

598 to procedures participants might find most burdensome or concerning – without affecting the overall  
 599 design of the study or our ability to realize the specific aims of the project.

600 With the approval of our funding agency (the National Cancer Institute), this modification requests that  
 601 we eliminate the two laboratory assessments of smoking reinforcement for the following reasons:

602 - They are the two longest study visits, and they are purely for research purposes, with no therapeutic  
 603 component.

604 - The lab task employed in these visits requires participants to repeatedly receive cigarettes, food  
 605 samples, and glasses of water from the researcher. Even though we take all COVID-19-related  
 606 precautions to reduce the risk of virus transmission, participants may still be concerned/distressed  
 607 about the possibility of contracting the virus during this procedure.

608 - Although we value the mechanistic data that comes from the lab visits, these data are secondary to  
 609 our primary outcomes (smoking cessation outcomes, ecological momentary assessments (EMA), and  
 610 biochemical measures of smoking exposure. The core study design (a double-blind, placebo-controlled  
 611 trial with follow-up through 6 months post-quit) is unaffected.

612 Training for the EMA will be moved from Lab Visit 1 to the end of the Intake Visit.

613

614 *Ecological Momentary Assessment (EMA).* Daily EMA data will be collected for 5 weeks before  
 615 TQD through 4 weeks post TQD (i.e., Weeks -5 to +4) using an application (app) that can be loaded onto  
 616 the participants' personal smartphone/tablet (significantly reducing participant burden; e.g., Ginexi et al.,  
 617 2014) or onto a study cell phone or tablet provided to the participant. The app – mobile EMA (mEMA;  
 618 <http://mobileema.com>; ilumivu, Inc.) allows de-identified data (linked only to participant ID) to be  
 619 synchronized with a secure server. EMA training and assessment procedures will follow our recent work  
 620 (Gass et al., 2012; Hawk et al., 2012). During the baseline lab visit, participants will be trained on proper  
 621 use of the app and will demonstrate the ability to complete both self-initiated assessments (questionnaires  
 622 that the participant initiates, e.g., morning assessment) and device-initiated assessments (alerts to  
 623 participant are provided on a pseudo-random basis). Participants will be informed that they will receive \$1  
 624 for completing each morning assessment and \$1 for completing each device-initiated assessment. To  
 625 improve adherence and reduce burden/intrusiveness, participants will select a 12-hour period during which  
 626 EMA prompts occur each day. Participants will be contacted by research staff ~3 days into the baseline  
 627 week to review adherence (based on incoming synchronized data) and troubleshoot any problems.

628 *Morning assessment.* Participants will be instructed to complete the morning assessment before  
 629 smoking their first cigarette of the day and within one hour of waking. In addition to reporting total number  
 630 of cigarettes smoked during the previous day (CPD), participants will report wake time and medication  
 631 adherence on the previous day. They will also complete a brief measure of craving, withdrawal, or  
 632 nausea/appetite. Altering the domain of assessment reduces both burden and reactivity, and  
 633 counterbalancing will ensure adequate coverage of all domains across the pre-quit period. At the end of this  
 634 assessment, the participants will be thanked for their report and reminded of the remuneration earned. In  
 635 our pilot work, most participants completed far more (mean=94%) than the 43% (3 days per week)  
 636 minimum required (Hawk et al., 2012).

637 *Device-initiated assessments.* Device-initiated prompts will be delivered 4 times per day (e.g.,  
 638 randomized within 3-hour blocks) to assess time since last cigarette and two of the following four domains:  
 639 subjective effects of smoking, craving, withdrawal, and nausea/appetite (see Measures for details). Thus,  
 640 each domain will be assessed up to twice per day. Counterbalanced presentation of domains across device-  
 641 initiated assessments will maximize coverage of time of day and distribution of domains across each week,  
 642 while reducing participant burden and reactivity compared to assessing every domain in each device-  
 643 initiated assessment. Sessions end with a reminder about remuneration earned. In our pilot work,  
 644 participants completed far more than the 50% minimum required (mean = 89%; Gass et al 2012).

645 **2019-11 update:** Note that in the 2019-11 IRB modification, we eliminated the 50% minimum (see  
 646 also Section 6.2) for the device-initiated prompts. Review of data for participants already screened for the  
 647 study demonstrated that participants had little trouble completing the morning assessments. This is

648 important, as the morning assessment contains measures central to the aims of the project. The device-  
 649 initiated assessments, which are less critical to the aims of the project, were associated with greater  
 650 challenges for participants, and roughly 10% of participants either had to complete a second week of  
 651 baseline or never met the 50% baseline adherence threshold and were excluded or withdrew. To more  
 652 efficiently complete the trial, we eliminated the 50% requirement for device-initiated assessments. We do,  
 653 of course, continue to encourage and remunerate completion of these assessments.

654 **UPDATE 2020-06-30 – OPTIONAL TROUBLESHOOTING SOFTWARE:** As detailed above,  
 655 participants are required to complete a minimum number of EMA assessments during the baseline week.  
 656 Even after the baseline week, missed assessments reduce both the data available to the project and  
 657 remuneration to participants. Consequently, it is important to quickly resolve any problems participants  
 658 have with the EMA app. To date, troubleshooting has generally required lengthy phone conversations  
 659 and/or ad hoc participant visits to the clinic for assistance. To minimize participant burden and more  
 660 quickly address technical problems with the EMA app, participants will be offered (at Intake) the option  
 661 install a free, HIPPA-compliant app (TeamViewer, <https://www.teamviewer.com/en-us/>) for  
 662 troubleshooting. Participants have the option to decline having this app installed on their device and, if it is  
 663 installed, participants can remove it at any time.

664 It will be explained to participants that, should they choose to install the TeamViewer app:

- 665 • TeamViewer allows research staff to, with the participant’s consent, view and remotely control the  
 666 participant’s smartphone for a remote troubleshooting session.
- 667 • TeamViewer will only be used for troubleshooting EMA problems. During any troubleshooting  
 668 session, research staff will use TeamViewer only to navigate into the EMA app and related  
 669 settings to address problems and demonstrate how to avoid further issues, all while the participant  
 670 observes the staff member’s actions.
- 671 • Staff cannot use the app without real-time consent (the participant must click a pop-up to start a  
 672 session). The participant can continue monitor their phone and view what is being accessed. If the  
 673 participant chooses, they can end the remote session at any time.
- 674 • TeamViewer does not collect or store any information.

675  For questionnaire items, see App10.3-04-Questionnaires.

676 *Study-Within-A-Trial (SWAT) on EMA Remuneration* – added to protocol on 2018-12-06. Pending  
 677 funding from the Buffalo CTSI Pilot Studies program, we plan to conduct a SWAT to evaluate methods to  
 678 improve adherence. Adherence in the current trial has not been as strong as in the pilot work reported above,  
 679 likely in part because the pilot study was shorter (only 5 weeks of EMA instead of 9). In the current study,  
 680 adherence has been strong at the outset but then dropped, with rates at their lowest during the critical 4-  
 681 week post-quit period. We also observe that adherence is lower among African-Americans than among  
 682 Caucasians. The goal of the SWAT is to evaluate two potential methods for improving adherence during  
 683 the post-quit period : increased frequency of payment (from once every two weeks to three times per week)  
 684 and increased amount of payment (from \$1/assessment to \$2/assessment).

685 In order to complete the EMA SWAT, over the course of a one-year period participants (equal  
 686 numbers of male and female, and of Caucasian and African-American) will be randomly assigned to each  
 687 of three conditions in advance of the TQD until we accrue 20 participants in each condition. At the TQD,  
 688 participants in the SWAT will receive a written consent addendum.

689  For the three versions of the addendum, see EvarQuit Addendum – EMA SWAT – 2018-12-06.doc.

690 Participants randomly assigned to the standard condition would simply be informed that it is  
 691 important to continue the EMA over the next four weeks. Participants randomly assigned to the increased  
 692 frequency of payment and increased amount of payment will have the opportunity to accept or decline the  
 693 modified payment plan. If they decline, they will simply continue to participate in EVarQuit, but will be  
 694 not be enrolled in the SWAT.

695 We chose individualized addenda over a single broad consent form because the SWAT will only  
 696 pertain to a subset of EVarQuit participants. We considered explaining all three conditions to SWAT

697 participants, but ultimately decided against it because doing so could cause unnecessary distress to  
 698 participants randomized to the standard condition (who might feel they were ‘losing out’ even though  
 699 nothing had changed).

700 The results of the SWAT will inform our decision of whether to alter remuneration for subsequent  
 701 participants in the EVarQuit project.

702 *Clinic visits (Weeks -4, -3, -1, 0 [TQD], 2, and 4), randomization, and study medication.* At Clinic  
 703 Visit 1 (Week -4), participants are randomized (within gender) to the extended or standard run-in group,  
 704 complete study measures (see below), receive brief behavioral counseling (see below) and study  
 705 medication (details below), and are instructed to begin the medication the next day. Subsequent study visits  
 706 are similar in process and content. *Randomization.* The study statistician (Co-I Dr. Colder) will implement  
 707 and monitor the small-urn randomization (within-gender in urns/blocks of 8 [4 extended run-in, 4 standard  
 708 run-in]), leaving remaining personnel blinded to group membership. Participants are considered part of the  
 709 intent-to-treat (ITT) sample once they are dispensed medication at Clinic Visit 1 (C1).

710 *Study medication.* At visit C1 (Week -4), participants will be provided an initial 1-week supply of  
 711 study medication (either varenicline or identical appearing placebo) and instructed on use (one 0.5 mg  
 712 tablet orally daily x 3 days, then one 0.5 mg tablet twice daily x 4 days, then two 0.5 mg tablets twice  
 713 daily). One week prior to TQD (Visit C3 / Week -1), participants assigned to placebo will be switched over  
 714 to varenicline with standard dose increases during the initial week of use. During the pre-quit period, all  
 715 study medication (active & placebo) will be dispensed as 0.5 mg tablets. This approach was successfully  
 716 used in Hawk et al. (2012) and will facilitate switching over from placebo to active medication while  
 717 maintaining blinding. From TQD through EOT, all participants will receive open-label varenicline (one 1.0  
 718 mg tablet twice per day).

719 Pfizer will provide varenicline and matching placebo for the study at no cost. Should this change, or should  
 720 we run low on study medication between shipments from Pfizer, the research pharmacy will produce  
 721 matching opaque capsules containing varenicline (which they can purchase in bulk) and placebo  
 722 (methylcellulose), as they have done in many prior studies.

723 Instructions for medication use will be reviewed at each clinic visit. Subjects will return any  
 724 unused medication at the following clinic visit and will be dispensed enough medication to last until the  
 725 next visit.

726  EVQ2CRFs – Intake (self-report and staff) pdfs include our side effect checklist from our previous  
 727 trial, supplemented with additional screening using the Columbia Suicide Severity Rating Scale  
 728 (CSSRS). Our emphasis will be on detecting, addressing, and reporting symptoms that are new or  
 729 increase from baseline. Consistent with App10-02, any new or increased suicidal ideation or behavior  
 730 will be evaluated by Drs. Hawk, Tiffany, or Mahoney (all study PIs are either clinical psychologists or  
 731 physicians trained in conducting further evaluation); the study PIs will make external (non-study)  
 732 referrals for additional evaluation or treatment as clinically indicated.

733 *Counseling.* As in our prior work (Hawk et al., 2012), participants will receive brief individual  
 734 behavioral counseling at 6 clinic visits (Weeks -4, -3, -1, 0 [TQD], 2, and 4) from counselors blind to  
 735 treatment group. Pre-quit sessions focus on topics common in behavioral counseling, including honing the  
 736 motivation to quit, identification of smoking triggers and trigger management, and social support (e.g.,  
 737 Abrams & Niaura, 2003; Fiore et al., 2008), without explicitly discussing extinction. However, to allow  
 738 extinction to occur, we will not include active nicotine fading as part of the counseling. Instead, participants  
 739 will be asked to follow their smoking urges, smoking at least 25% of their baseline rate to allow their  
 740 bodies time to adjust to the medication, as in prior extended pre-quit work (Hawk et al., 2012, 2015; Rose  
 741 et al., 1998). In response to feedback from participants in prior studies, we will also offer brief counseling  
 742 “check-ins” by phone 1 and 7 weeks post-TQD.

743  App10-03a-EVQ2 Counseling SOP 2017-09-21.docx provides the Counselor Manual and App10-03b-  
 744 EVQ2 Counseling Handouts 2017-09-21.docx provides the participant workbook.

745 *End-Of-Treatment (EOT) and 6-months post-TQD (6M) visits* allow for biochemical verification  
 746 of self-reported abstinence, the primary outcome measure. Retention has been strong in our prior  
 747 varenicline studies (Hawk et al., 2012; Lerman et al., 2015). Clear explanations of the importance of



748 follow-up data for clinical application, ongoing contact with participants (including reminder calls), and  
 749 increased remuneration for attendance at EOT and 6M visits (when medication is no longer being provided)  
 750 bolster retention, which is expected to be 95% at TQD, 82% at EOT, and ~75% at 6M (based on Hawk et  
 751 al., 2012 and the Buffalo varenicline arm data from Lerman et al, 2015).

752 **Update 2019-11:** Retention at EOT and 6M follow-up has been substantially lower than anticipated. We  
 753 believe this is related to several inter-related factors. First, because of the EMA remuneration (up to  
 754 \$35/week), remuneration at Clinic Visits is much higher than in our prior studies. Second, remuneration at  
 755 EOT and 6M is actually somewhat lower than in our prior work – we did this in an effort to stay under the  
 756 \$600 threshold at which a 1099 would have to be issued, requiring participants to provide us with their  
 757 SSN. We now re-balance the remuneration by shifting some remuneration from Clinic visits (which already  
 758 have greater value because of the treatment received and the EMA remuneration) to the follow-up period  
 759 (see Section 26).

760 In addition, we have observed that many participants do not answer the reminder calls for follow-  
 761 up visits, and when they do not answer the phone call they are very likely (70-90%) to miss the subsequent  
 762 follow-up. After extensive discussion with staff, and consideration of anecdotal information from  
 763 participants, we will replace the reminder calls with brief (1-2 questions) REDCap surveys (see App 11.1 –  
 764 Template for REDCap Follow-Up Survey) delivered via a text message link to the participant's phone. We  
 765 have designed a plan we believe offers multiple advantages:

766 1) Rather than requiring that a participant answer our phone call at a specific time, participants can respond  
 767 to a REDCap survey whenever they are available. Because participants have already completed 9 weeks of  
 768 electronic assessments, this should be convenient and low-burden.

769 2) REDCap allows us to automate reminders to participants' who do not respond to the initial text of a  
 770 survey link. We will send up to 3 reminders for each survey.

771 3) In contrast to phone calls, which could be associated with shame or embarrassment for participants who  
 772 report relapsing to smoking, the REDCap surveys allow participants to report electronically without direct  
 773 mention of the behavior to study staff.

774 4) Because the surveys are so brief, we can actually have more frequent contact with participants during the  
 775 follow-up period (1, 3, and 5 weeks before EOT and 4 and 8 weeks before 6M follow-up), which should  
 776 enhance retention rates.

777 *Participant Satisfaction Surveys (C4 and EOT)* Participants will be given satisfaction surveys at  
 778 Clinic visit #4 (C4) and the End of treatment (EOT) visits. These surveys will be distributed in an unsealed  
 779 enveloped. The participant will be asked to complete the survey on paper, in private, to answer honestly,  
 780 and to seal the survey into the envelope after completion. Surveys will be delivered to Dr. Hawk; research  
 781 assistants will not read the surveys of their participants. The C4 survey was not completed by those who  
 782 had C4 before the 2019-05 modification. The EOT survey was mailed to participants who completed EOT  
 783 prior to approval of the 2019-05 modification. Please see Satisfaction for EVQ 2019-05-02.docx.

784 **Update 2020-04 – COVID-19 impact:** Anecdotally, our smoking cessation trial participants have  
 785 reported varied impact of COVID-19 on their quit smoking efforts. To more formally collect qualitative  
 786 and quantitative data regarding the impact of COVID-19, we added a questionnaire (App - COVID-19  
 787 Quitting Questions\_v3.5 - EVarQuit 2020-04-20.docx) to be administered once per participant. The  
 788 COVID-19 questionnaire will be assessed at each participant's end-of-treatment (EOT) (remote) visit. If  
 789 the person has already passed the EOT appointment, but has not yet reached the 6-month visit, we will ask  
 790 them to complete it at the 6-month (remote) visit. The questionnaire is completely optional. The  
 791 questionnaire would be employed until the stay-at-home order is lifted or all currently enrolled participants  
 792 reach the 6-month milestone or government-mandated social distancing measures are eliminated in New  
 793 York, whichever is later.

794 **Update 2020-5-21 – Further assessing COVID-19 impact:** The EvarQuit project was forced to  
 795 implement changes to the provision of treatment due to the COVID-19 pandemic. One of the primary  
 796 changes involved the transition from in-person counseling to remote counseling via Zoom software (when  
 797 possible) or phone calls. In order to understand the opinions and experiences of participants in the  
 798 EvarQuit project who completed at least one at-home counseling session as a result of the COVID-19

799 pandemic, we will be conducting voluntary individual interviews with about 25 currently enrolled  
 800 participants. The goal of these one-on-one structured interviews is to improve the quality of the remote  
 801 visits and enhance the subjective experience of our participants. Trained research assistants will contact  
 802 participants by phone as close as possible following the Clinic 6 visit to introduce the interview. If the  
 803 participant agrees to the procedures and provides verbal consent, the interview will be audio recorded so it  
 804 can be coded by independent staff members. Audio recordings, labeled only with a participant number, will  
 805 be stored on our secure server, and will be used to generate written transcripts for qualitative analyses. We  
 806 will keep the audio recording for up to 6 months as they will be used to clarify information in the  
 807 transcripts and will help to clarify the context of information obtained during interviews. Participant  
 808 responses will remain anonymous.

809 **Update 2020-05-29: COVID-19-related procedural changes:** Per the UB Human Studies guidance  
 810 05212020.docx, the following procedural changes will be implemented in an effort to minimize  
 811 transmission of the virus:

812 **Engineering Measures:**

- 813 • The clinic hallway (3rd floor in Diefendorf Hall) is approximately 11 ft wide; taped lines will be  
 814 placed 2.5 ft from either wall all of the way down the hallway. People moving west to east will walk  
 815 down one side of the hallway and those moving east to west will walk down the other side of the  
 816 hallway. This will ensure that a distance of > 6ft can be maintained in the hallway at all times.
- 817 • Participants typically sit in chairs located in the main hallway of the clinic to wait for their  
 818 appointment to start. The chairs will be removed from the hallway and participants will be escorted to  
 819 a private interview room upon arrival to the clinic.

820 **Administrative Measures:**

- 821 • Staff will be asked to enter the clinic using the elevator OR the stairwell on the east end of the building  
 822 and to leave using the stairwell on the west end. Staff arrival and departure times will be staggered as  
 823 well to minimize stairwell traffic.
- 824 • Staff will be asked to wash their hands thoroughly and often, including immediately upon arrival,  
 825 using CDC guidelines and to avoid touching their face.
- 826 • Room occupancy will be limited to maintain distances of at least 6 feet between staff and research  
 827 participants except for brief procedures (such as blood pressure), during which staff will wear gloves,  
 828 face mask, and eye protection (consistent with UB Human Studies guidance 05212020.docx).
- 829 • Signage outside the elevator and in the hallway will inform participants regarding the above measures  
 830 as well as the need to have only one person on the elevator at a given time.

831 **Prescreening of Research Participants:**

832 As per the UB Human Studies guidance 05212020.docx, the following will be done prior to all participant  
 833 visits:

834 During the reminder call the day before a visit:

- 835 • Participants will be asked to take their temperature; if they don't have a thermometer, they will be  
 836 asked whether they feel feverish.
- 837 • Participants will be asked about the presence of any COVID-19 symptoms including: fever, cough,  
 838 shortness of breath, sore throat, muscle aches, headache, new loss of taste or smell, and repeated or  
 839 shaking chills (as noted on page 2 of the UB Human Studies Guidance 05212020.docx).
- 840 • Anyone known to be COVID-19 positive or who exhibits COVID-19 symptoms will be restricted from  
 841 enrollment / attending in-person visits until symptom free and at least 14 days since date of diagnosis.  
 842 For enrolled participants, remote visits (telemedicine) will be scheduled in the interim as the health of  
 843 the participant allows.

844 Before leaving home on the day of a visit

- 845
- Participants will be asked to take their temperature at home.
- 846
- Participants will be asked to report any new symptoms on the day of the visit to the project coordinator
- 847
- 848
- Participants will be asked to wear a face covering prior to entering the building; if they arrive without a
- 849
- 849
- 849

#### **Revised Visit Scheduling Enhances Social Distancing:**

- 851
- To support physical distancing and prevent congestion, intake appointment times will be arranged so
- 852
- 853
- 854
- 855
- Clinic visits will be scheduled with at least 15 minutes staggering of arrivals and departures of other
- 856
- 857
- 857

**Consent Addendum:** A consent addendum will be employed that advises participants of all COVID-related requirements and procedures. See Section 29.0: Process to Document Consent.

#### **Disinfection of Shared Equipment and Spaces:**

- 861
- Before and after each in-person appointment or use of a shared room or piece of equipment, all hard
- 862
- 863
- 864
- A disinfecting checklist will be placed on the door of each participant room or shared space; staff will
- 865
- 866
- Participants will be given a pen to use during their visit that then will then take with them so multiple
- 867
- 867

#### **Remote Study Visits:**

- 869
- Study visits will be conducted remotely, rather than in person at UB, under the following circumstances.
- 870
- If a participant reports COVID-19 symptoms or diagnosis, then remote visits will be scheduled at least
- 871
- 872
- If UB determines that research projects cannot have in-person visits for a period of time (for example,
- 873
- 874
- Other circumstances in which study staff and the participant agree that one or more remote visits are
- 875
- 876
- To enhance compliance with follow-up appointments at which primary outcome measures are
- 877
- 878
- 879

Participants will be instructed regarding the details of remote study visits, including the need for privacy, the methods for delivery and return of study materials, and the technology (Zoom or telephone; REDCap) for completing study visits. Informed consent for remote study visits will be obtained with the aid of the attached *EVarQuit Consent Addendum – COVID-19.docx*.

**UPDATE 2020-06-12 - ELIMINATION OF LAB VISITS FOR REMAINING PARTICIPANTS.** As noted above, due to concerns about enrollment, participant burden, and perceived ppt risks, we are eliminating the lab visits for the remaining participants.

**UPDATE 2020-06-30 – OPTIONAL SALIVA SAMPLE FOR GENETIC ANALYSIS.** Consistent with the administrative supplement submitted to NCI, ITT participants will be asked to provide an optional additional saliva sample for genetic analysis. In brief, 30 minutes after eating, drinking, or smoking,

892 participants who consent to provide a genetics sample will provide a 2 mL saliva sample using an Oragene  
893 kit (DNA Genotek, Inc.).

894 For participants enrolled after approval of the genetics sample, an overview and the consent  
895 addendum (see EVarQuit Genetics Sub-Study - Consent Addendum - onsite - 2020-06-30.docx) will be  
896 presented at Clinic 2 (future participants). Reasons for waiting until Clinic 2 (as opposed to including with  
897 the initial study consent at intake) include: a) Because the major focus of these analyses is to better  
898 understand variability in response to varenicline, and varenicline is first measurable at Clinic 2, we do not  
899 wish to obtain samples from participants who are found ineligible or withdraw prior to Clinic 2, and b)  
900 Providing the consent addendum in close temporal proximity to obtaining the sample, rather than adding  
901 the information to the already lengthy consent form at intake, should enhance participant understanding of  
902 what is required versus optional and improve understanding of the specific issues related to the optional  
903 genetics sample.

904 For participants who have already completed Clinic 2, an overview and the consent addendum will  
905 be presented at their next study visit (see EVarQuit Genetics Sub-Study - Consent Addendum - onsite -  
906 2020-06-30.docx). If the participant has already completed all required study visits, study staff will attempt  
907 to reach the participant by phone and/or email (see EVarQuit Genetics Sub-Study Initial Contact – Phone  
908 and Email Scripts 2020-06-30.docx). No more than two attempts with each method will be made, to avoid  
909 “hounding” the participant. If the participant is reached and expresses interest, or if the participant was not  
910 reached by phone/email, the following will be sent by postal mail:

911 - EVarQuit Genetics Sub-Study – Addendum Cover Letter – 2020-06-30.docx

912 - EVarQuit Genetics Sub-Study - Consent Addendum - home - 2020-06-30.docx

913 Participants who return written consent to providing the sample will be mailed standard DNA Genotek  
914 Oragene saliva sample kit and pre-paid return mailer. Participants will be remunerated upon receipt of the  
915 sample (see Remuneration).

916

917 Regarding issues relevant to Section 2 of HRP-399 (WORKSHEET: Additional Requirements for Genetic  
918 Testing (NY State)):

- 919 • Consent will be obtained directly from the participant (no samples taken from deceased individuals).
- 920 • As described in the consent addendum, samples will be stored independent of other participant  
921 information, making it impossible that genetic information would ever be incorporated into the records  
922 of a nonconsenting individual.
- 923 • Consent for banking and additional genetic testing are explicitly obtained in the consent addendum.
- 924 • As explicitly stated in the consent addendum: “If you say yes now, but you change your mind later, it  
925 will not be held against you or affect your participation in EVarQuit. You can always call (716-829-  
926 2323) or email us (EVarQuit@buffalo.edu) to say that you have changed your mind, and the DNA  
927 sample will be destroyed.” In such an event, the PI (Dr. Hawk) will contact Dr. Tyndale at the  
928 University of Toronto to ensure the deidentified sample is destroyed.
- 929 • “Family members of an individual who provided a stored tissue sample will NOT be contacted for  
930 clinical, research, or other purposes without consent from the individual who provided the tissue  
931 sample with respect to the specific family members who will be contacted and the specific purpose of  
932 the contact.” (HRP-399) As of this version of the protocol, we do not anticipate ever contacting family  
933 members of participants and would submit a modification in advance of any such contact.
- 934 • “Information about an individual derived from genetic tests performed on stored human tissue or  
935 information linking an individual with specific results of genetic tests will NOT be released to any  
936 organization or person without the explicit written consent of the individual who donated the stored  
937 tissue to release of the information for the purposes set forth in the written consent document” (HRP-  
938 399).

- 939 • “DNA samples will be stored for no more than ten years in the absence of genetic testing, if authorized  
 940 in writing by the subject. If genetic testing will be performed on the stored samples or samples will be  
 941 stored for more than 10 years, informed consent will be obtained” (HRP-399).

942

943 *10.2 Describe what data will be collected.*

944 *NOTE: For studies with multiple data collection points or long-term follow up, consider the*  
 945 *addition of a schedule or table in your response.*

946 Response: Measures reflect the aims of the project: evaluating the efficacy of a promising approach to  
 947 smoking cessation (Aim 1, with a focus on abstinence at EOT and 6M), and gaining insight into the  
 948 mechanisms and moderators of treatment effects (Aims 2 and 3; with an emphasis on measures obtained  
 949 between Intake and TQD). Please see the table of assessments and measures in Section 11.1

950

951 *10.3 List any instruments or measurement tools used to collect data (e.g.*  
 952 *questionnaire, interview guide, validated instrument, data collection form).*  
 953 *Include copies of these documents with your submission.*

954

Response:

955

Smoking rate – How many cigarettes did you smoke yesterday?

956

 Expired-air CO – Biochemical verification obtained with a hand-held carbon monoxide (CO) meter  
 957 (see CRF – e.g. EVQCRFs - Intake - Staff Instruments).

958

 Cotinine/3-hydroxy-cotinine – Biochemical verification and rate of metabolism – patients will provide  
 959 saliva samples at all Clinic visits as well as follow-up visits, (see App10.3-03).

960

 Varenicline levels – patients will provide saliva samples at all Clinic visits, EOT and 6 month follow-  
 961 up.

962

 Validated Questionnaires that assess the following are included in App10.3-04- Questionnaires-2016-  
 963 09-23.docx:

964

- Craving
- Withdrawal
- Subjective effects of smoking
- Nausea
- Treatment expectancies

965

966

967

968

969

 The urine collection and drug testing procedure is described in App10.3-05-UrineToxProcedure.

970

971

Our standard side effects assessment (e.g., Hawk et al., 2012; Lerman et al., 2015) has been updated to  
 972 include the CSSRS and is included on the CRFs for intake.

972

973

 2020-04: App - COVID-19 Quitting Questions\_v3.5 - EVarQuit 2020-04-20.docx

974

 2020-05-19: App – COVID-19 Structured Interview-EVarQuit 2020-05-19.docx

975

976

*10.4 Describe any source records that will be used to collect data about subjects (e.g. school records,*  
*electronic medical records).*

977

Response: N/A, no external records will be used to collect data about subjects.

978

N/A. We will not obtain external source records.

979 10.5 Indicate whether or not **individual** subject results, such as results of investigational diagnostic tests,  
 980 genetic tests, or incidental findings will be shared with subjects or others (e.g., the subject's primary  
 981 care physician) and if so, describe how these will be shared.

982 Response: Individual subject results will not be shared with participants or others.

983  
 984 10.6 Indicate whether or not **study** results will be shared with subjects or others, and if so, describe how  
 985 these will be shared.

986 Response: We will maintain a list of participants who would like to be notified of study results and will  
 987 provide those participants with brief summaries of project results in short newsletters in the Fall of 2020,  
 988 2022, and 2024. These summaries will be shared via email or post based on participant preferences.

## 989 11.0 Study Timelines

990 11.1 Describe the anticipated duration needed to enroll all study subjects.

991 Response: 48 months

992 11.2 Describe the duration of an individual subject's participation in the study. Include length of study  
 993 visits, and overall study follow-up time.

994 Response:

995 Participants will complete screening, active treatment, and long-term (6-month) follow-up, with an  
 996 estimated total time commitment of ~~~26.5~~ 23 hours.

997 Phone screen ~ 0.5 hours

998 Intake ~ 2.0 hours

999 ~~Lab Visit 1 ~ 2.0 hours-Eliminated 2020-06-12~~

1000 ~~Lab Visit 2 ~ 1.5 hours-Eliminated 2020-06-12~~

1001 Clinic visits 1-6 @~1 hour each ~ 6.0 hours

1002 Brief counseling check-ins 1-2 ~ 0.5 hours

1003 EMA @0.33 hours/day X @5 days/wk X 9 wks ~15.0 hours

1004 5 1-minute follow-up surveys ~ 0.1 hours

1005 EOT/6M/ follow-ups @ .5 hrs each ~ 1.0 hour

1006 11.3 Describe the estimated duration for the investigators to complete this study (i.e. all data is collected  
 1007 and all analyses have been completed).

1008 Response: 5.5 years (begin accrual in month 9; enroll last subject in month 51; complete 6-month follow-  
 1009 up in month 57; begin primary analyses)

## 1010 12.0 Setting

1012 12.1 Describe all facilities/sites where you will be conducting research procedures. Include a description  
 1013 of the security and privacy of the facilities (e.g. locked facility, limited access, privacy barriers).  
 1014 Facility, department, and type of room are relevant. Do not abbreviate facility names.

1015 NOTE: Examples of acceptable response may be: "A classroom setting in the Department of  
 1016 Psychology equipped with a computer with relevant survey administration software," "The  
 1017 angiogram suite at Buffalo General Medical Center, a fully accredited tertiary care institution  
 1018 within New York State with badge access," or, "Community Center meeting hall."

1019 Response:

1020 The proposed clinical trial will take place in Dr. Hawk's lab on the third floor of Diefendorf Hall at the  
 1021 State University of New York at Buffalo. The third floor is secured with swipe card access and video-  
 1022 enabled two-way intercoms for enhanced security, privacy, and confidentiality. Within the lab are a range  
 1023 of individual rooms, each of which can be locked independently. Clinical assessments and cessation  
 1024 counseling are easily accommodated in the five interview rooms. Two medical exam rooms allow a range

1025 of health-related assessments. A room dedicated to phlebotomy and urine toxicology is located adjacent to  
 1026 the lab restrooms; the room is equipped with a -5C freezer for short-term storage prior to transfer of  
 1027 samples to a 17-foot -80C freezer in the adjacent room for long-term storage. The research pharmacy has  
 1028 an on-site, alarmed room for storage of medications, reconciliation and randomization procedures, and  
 1029 relevant documentation. A white noise system enhance confidentiality between assessment rooms. A  
 1030 waiting room and kitchen with refreshments provide a welcome environment for participants, and a large  
 1031 seminar room provides ample space for study overview sessions.

1032 Dr. Hawk and project staff will have access to approximately 15 PC computers data-entry, word  
 1033 processing, and clerical activities. All computers are on a network with centrally-maintained backups on a  
 1034 secure server that is accessible through Citrix software; the server is maintained by the Office of Medical  
 1035 Computing.

1036 Laboratory assessments of reinforcement will take place in specialized research space dedicated to Dr.  
 1037 Hawk in Farber Hall (Rooms 155 and 157); backup smoking labs dedicated to Co-I Dr. Tiffany on the third  
 1038 floor of Park Hall may be used as a backup. This separation of laboratory assessments is by design; it  
 1039 separates the clinical smoking cessation and the lab assessments that involve smoking in a controlled  
 1040 environment. Drs. Hawk and Tiffany have offices on both campuses, allowing frequent interaction on the  
 1041 project. Swipe card (Hawk lab) and punch locks (Tiffany lab) separates the lab from hallway traffic, and  
 1042 each room within the lab is also secured with a standard door lock. Each lab consists of 500+ square feet of  
 1043 testing space, including two subject rooms and a master control room outfitted with equipment for  
 1044 complete CBUCC testing (test apparatus, computers, monitors, modified response boxes, keyboards, mouse  
 1045 for measuring response times with millisecond accuracy), refrigerators, high definition cameras in subject  
 1046 rooms, and secure access to the UB Box server that will maintain all study data. This test space is  
 1047 customized with ventilation and air handling systems that isolate the rooms from the rest of the building  
 1048 and allow for smoking in the test rooms with very high turnover air exchange ventilate directly to the  
 1049 exterior of the building.

1050 *12.2 For research conducted outside of UB and its affiliates, describe:*

- 1051
- *Site-specific regulations or customs affecting the research*
  - *Local scientific and ethical review structure*
- 1052

1053 *NOTE: This question is referring to UB affiliated research taking place outside UB, i.e. research*  
 1054 *conducted in the community, school-based research, international research, etc. It is not referring*  
 1055 *to multi-site research. UB affiliated institutions include Kaleida Health, ECMC, and Roswell Park*  
 1056 *Cancer Institute.*

1057 Response:

1058  N/A: This study is not conducted outside of UB or its affiliates.

### 1059 **13.0 Community-Based Participatory Research**

1060 *13.1 Describe involvement of the community in the design and conduct of the research.*

1061 *NOTE: Community-Based Participatory Research (CBPR) is a collaborative approach to research*  
 1062 *that equitably involves all partners in the research process and recognizes the unique strengths that*  
 1063 *each brings. CBPR begins with a research topic of importance to the community, has the aim of*  
 1064 *combining knowledge with action and achieving social change to improve health outcomes and*  
 1065 *eliminate health disparities.*

1066 Response:

1067  N/A: This study does not utilize CBPR.

1068 *13.2 Describe the composition and involvement of a community advisory board.*

1069 Response:

1070  N/A: This study does not have a community advisory board.

1071  
1072

## 14.0 Resources and Qualifications

1073  
1074  
1075  
1076

14.1 Describe the qualifications (e.g., education, training, experience, expertise, or certifications) of the Principal Investigator **and** staff to perform the research. When applicable describe their knowledge of the local study sites, culture, and society. Provide enough information to convince the IRB that you have qualified staff for the proposed research.

1077  
1078  
1079  
1080

*NOTE: If you specify a person by name, a change to that person will require prior approval by the IRB. If you specify a person by role (e.g., coordinator, research assistant, co-investigator, or pharmacist), a change to that person will not usually require prior approval by the IRB, provided that the person meets the qualifications described to fulfill their roles.*

1081

Response:

1082  
1083  
1084

Co-PIs Hawk, Mahoney, and Tiffany will share leadership of the study, as described in the attached grant proposal (see Shared Leadership Plan in App00). This team has worked together on previous clinical trials, including the EvarQuit pilot study that led to the current trial (e.g., Hawk et al., 2012).

1085  
1086  
1087  
1088  
1089  
1090  
1091  
1092  
1093  
1094  
1095  
1096  
1097  
1098  
1099

**Dr. Hawk** is a Professor of Psychology. His doctoral training in clinical health psychology provided him with an excellent background in theory, methods, and interventions for a range of health behaviors, and this expertise was enhanced by his post-doctoral fellowship in the Division of Behavioral Oncology at the University of Pittsburgh Cancer Institute. Over the past decade, he has developed expertise in smoking behavior and clinical cessation trials; he has conducted numerous smoking studies, including four randomized clinical trials (RCTs; two as Co-I, one as PI, one as site PI), all of which included pharmacotherapy and counseling. The two most recent trials (with Co-PI Mahoney) focused on an extinction-based model, using extended pre-quit pharmacotherapy to enhance smoking cessation; they provide the foundation for the proposed RCT. Dr. Hawk has provided and supervised delivery of cessation counseling and developed the treatment materials for the present study. Beyond RCTs, Dr. Hawk has published mechanism-oriented experimental work on the effects of nicotine, varenicline (the medication employed in the current proposal), and other drugs on basic reinforcement, cognitive, and subjective processes, as well as the role of these basic processes on the development of substance use. Overall, he is well-suited to serve as PI on the current proposal to evaluate the efficacy and mechanisms of extended pre-quit run-in varenicline for smoking cessation.

1100  
1101  
1102  
1103  
1104  
1105  
1106

**Dr. Mahoney** is a Professor of Oncology and Staff Physician at Roswell Park Cancer Institute (and has an appointment at UB). As PI or co-investigator, Dr. Mahoney has played key roles in the design, successful implementation and analyses of multiple smoking cessation clinical trials which have relied upon a variety of pharmacotherapies/interventions including: nicotine free cigarettes, St. John's Wort, bupropion, a nicotine conjugate vaccine, a nicotine liquid delivery system and varenicline. Together with Dr. Hawk, he recently participated in a multi-site cessation trial which used nicotine metabolism ratios (NMR) to randomize 1400+ smokers to either varenicline + placebo NRT, NRT + placebo varenicline or placebo.

1107  
1108  
1109  
1110  
1111  
1112  
1113  
1114  
1115  
1116  
1117  
1118  
1119

**Dr. Tiffany** is an Empire Innovation Professor in Psychology. He brings considerable expertise derived from his ongoing research on the assessment of smoking and craving using ecological momentary assessment (EMA) technology (including work with Drs. Hawk and Mahoney; e.g., Gass et al., 2012; Hawk et al., 2012), processes of drug craving, the causes of drug dependence, the diagnosis of dependence, adolescent drug use, and the interaction of biological and psychological factors in the control of addictive behaviors. Dr. Tiffany's craving work focuses on understanding the role of drug craving in addiction. One of his longstanding interests is on the development and validation of instruments to sensitively and accurately measure drug craving; he has led development of widely used measures of alcohol, cigarette, cocaine, and heroin craving. Dr. Tiffany has also developed and validated multiple methods to study cue-specific craving and, of particular relevance to this research, have conducted research on the assessment of cue-reactivity in the natural environments of cigarette smokers. Dr. Tiffany was awarded the American Psychological Association Distinguished Scientific Award for Early Career Contribution to Psychology in 1993, and he has served as a member of several NIH scientific review panels.

1120  
1121

**Dr. Colder**, who will handle the biostatistics and randomization for the current project, is a Professor of Psychology at UB. He has actively studied developmental models of psychopathology and adolescent



1122 substance user for over 20 years. Dr. Colder has been Principal and Co-Investigator on multiple NIH  
 1123 funded longitudinal studies that span infancy to young adulthood. Dr. Colder's background also includes  
 1124 extensive training in quantitative methods, such as hierarchical linear models, structural equation modeling,  
 1125 growth modeling, mixture modeling, and testing moderation and mediation. Dr. Colder and Dr. Hawk have  
 1126 co-authored numerous publications from several collaborative studies at UB over the past 10 years.

1127 **Jennifer Adams**, M.S.W., Research Coordinator, has worked for several years with Drs. Hawk and  
 1128 Mahoney on another large smoking cessation trial. Ms. Adams is familiar with the proposed assessments  
 1129 and procedures and will oversee all day-to-day aspects of the proposed study. She is already assisting with  
 1130 the development of the current IRB proposal and is familiar with UB IRB procedures, monitoring/reporting  
 1131 of side effects and adverse events. Ms. Adams, an M.S.W. with extensive experience in smoking cessation  
 1132 trials, will assist with implementation and training on psychiatric screening and cessation counseling. She  
 1133 will work with the research nurse to oversee sample collection and shipping, as per our standard protocols.  
 1134 Ms. Adams will work closely with Drs. Hawk and Colder to maximize retention at follow-up and interface  
 1135 between research pharmacist and project staff regarding medication disbursement and reconciliation. Ms.  
 1136 Adams will oversee recruitment, data collection and data entry to ensure all study activities are done  
 1137 according to GCP and within the appropriate timeframe. Ms. Adams will work with Drs. Hawk and other  
 1138 study investigators to refine all study protocols, respond to data management queries, review study charts to  
 1139 ensure the quality of the data captured.

1140 Details for additional staff will be provided once the project has begun and we begin hiring.

1141

1142 ***Describe other resources available to conduct the research.***

1143 *14.2 Describe the time and effort that the Principal Investigator and research staff will devote to*  
 1144 *conducting and completing the research.*

1145 *NOTE: Examples include the percentage of Full Time Equivalents (FTE), hours per week. The*  
 1146 *question will elicit whether there are appropriate resources to conduct the research.*

1147 Response: Larry Hawk, Ph.D., Principal Investigator, (1.8 academic months and 1.8 summer months in all  
 1148 years). Dr. Hawk will be responsible for the scientific and technical direction of the proposed research. He  
 1149 will supervise most aspects of the project (see leadership plan), including hiring and training staff,  
 1150 supervising data collection, verification, and analysis, and leading manuscript and report preparation. Dr.  
 1151 Hawk will meet at least weekly with Research Coordinator and co-lead biweekly staff meetings and  
 1152 monthly calls with study investigators. Dr. Hawk will supervise the provision of behavioral counseling and  
 1153 lead the development of conference presentations and publications.

1154 Stephen Tiffany, Ph.D., Principal Investigator, (1.2 academic months and 0.6 summer months in all years).  
 1155 Dr. Tiffany will take primary responsibility for the laboratory assessments of reinforcement during the pre-  
 1156 quit period. He will work closely with Dr. Hawk to coordinate clinical and laboratory assessments and Dr.  
 1157 Tiffany will assist in the management, reduction, and analysis of the laboratory data. Dr. Tiffany will also  
 1158 provide leadership and oversight on the ecological momentary Dr. Tiffany will contribute actively to work  
 1159 with all study investigators to interpret and disseminate results.

1160 Craig Colder, Ph.D., Co-Investigator, (1.8 academic months and 0.6 summer months in YR01 and YR05;  
 1161 0.9 academic months and 0.3 summer months in YR02-04). Dr. Colder will oversee the randomization  
 1162 procedures for the trial. Dr. Colder will also assist with tracking and maintaining retention during follow-up  
 1163 period, work with Dr. Hawk to coordinate integrated data management procedures, and lead data analysis  
 1164 as the project statistician. He will work with all study investigators to interpret and disseminate results.

1165 Project Manager, TBN (1.2 calendar months in all years). The PM will consult with and assist PIs Hawk  
 1166 and Mahoney and Project Coordinator on high-level implementation and administration, as well as  
 1167 coordination of the proposed study with other projects in the CCF. As needed, she will lead intake visits  
 1168 and assist with staff training. She will also conduct protocol fidelity checks and provide an independent  
 1169 auditor of financial records, as required by institutional policy.

1170 Jennifer Adams, MSW, Project Coordinator (12 calendar months in all years). The PC will assist the Co-  
 1171 PIs in submitting and maintaining IRB materials and monitoring/reporting side effects and adverse events.

1172 The PC will oversee recruitment, data collection and data entry to ensure all study activities are done  
1173 according to GCP and within the appropriate timeframe.

1174 Nurse/Phlebotomist, TBN (3.6 calendar months in YR01, 4.8 calendar months in YR02-04, 2.4 calendar  
1175 months in YR05). As in our recent multi-site cessation trial, the Nurse/Phlebotomist will assist the study  
1176 MD and staff during the medical screening process. She will also conduct saliva samples and oversee urine  
1177 toxicology and pregnancy screening at intake visits. She will assist with sample processing, storage, and  
1178 shipping.

1179 TBN, Research Support Specialists, (4@6.0 calendar months in YR01, 5@6 calendar months in YR02-04,  
1180 4@6.0 calendar months in YR05). The RSSs will aid in recruitment and retention efforts by conducting  
1181 initial screenings, placing reminder phone calls, sending mail outs, and scheduling visits, under the  
1182 supervision of the Project Coordinator. RSSs will be trained to conduct most study assessments per  
1183 rigorous, detailed protocols, including the collection of lab reinforcement data and training participants in  
1184 use of ecological momentary assessment. RSSs will work with the Coordinator to implement the daily  
1185 operations of the study, including data entry, maintaining supply levels, and responding to data queries.

1186 *14.3 Describe the availability of medical or psychological resources that subjects might need as a result*  
1187 *of anticipated consequences of the human research, if applicable.*

1188 *NOTE: One example includes: on-call availability of a counselor or psychologist for a study that*  
1189 *screens subjects for depression.*

1190 Response: Study staff will be available by phone during normal business hours, and they will have prompt  
1191 access to Co-PIs Hawk (a clinical psychologist) and Mahoney (a physician) for clinical issues that arise in  
1192 the course of smoking cessation with varenicline, as in our prior trials. As in our prior work, we will  
1193 provide participants with contact information and reminder cards and, when appropriate, referrals for  
1194 resources external to the focus of the project.

1195 *14.4 Describe your process to ensure that all persons assisting with the research are adequately informed*  
1196 *about the protocol, the research procedures, and their duties and functions.*

1197 Response: All staff will be provided with copies of the grant proposal. Study protocols are provided in  
1198 binders in the relevant rooms, and training of study staff will include direct observation of mock  
1199 procedures, followed by supervision in real patient interactions. Duties will be documented in a  
1200 continuously updated delegation log that will be signed by the staff member whenever there is a change.

## 1201 **15.0 Other Approvals**

1202 *15.1 Describe any approvals that will be obtained prior to commencing the research (e.g., school,*  
1203 *external site, funding agency, laboratory, radiation safety, or biosafety).*

1204 Response:

1205  N/A: This study does not require any other approvals.

## 1206 **16.0 Provisions to Protect the Privacy Interests of Subjects**

1208 *16.1 Describe how you will protect subjects' privacy interests during the course of this research.*

1209 *NOTE: Privacy refers to an individual's right to control access to him or herself. Privacy applies*  
1210 *to the person. Confidentiality refers to how data collected about individuals for the research will be*  
1211 *protected by the researcher from release. Confidentiality applies to the data.*

1212 *Examples of appropriate responses include: "participant only meets with a study coordinator in a*  
1213 *classroom setting where no one can overhear", or "the participant is reminded that they are free to*  
1214 *refuse to answer any questions that they do not feel comfortable answering."*

1215 Response: Above (sections 9 and 12) we describe how we will protect subjects' privacy interests during the  
1216 recruitment and consent phases. Throughout the research process, we respect participant's rights to refuse  
1217 to complete any assessment and to withdraw from the study at any time, thus giving them control of

1218 information access to themselves. (When appropriate, we will remind participants that refusal to complete  
1219 assessments may lead the study investigators to withdraw the participant from the trial.)

1220 Many of the measures will be self-administered, so participants will directly enter their responses into a  
1221 computer/tablet/smartphone without the interviewer seeing their responses. This increases privacy and  
1222 reduces potential discomfort.

1223 Participants will meet individually with study investigators and staff in private offices; privacy is enhanced  
1224 by the swipe card security system (limiting access) and the white noise system (reducing concerns about a  
1225 conversation being overheard).

1226 **UPDATE 2020-05-29: COVID-19:**

1227 For remote visits during the COVID-19 pandemic, the use of telemedicine technology (Zoom; telephone  
1228 calls), we will advise participants to attend the visit in a private setting. Zoom meetings will be password-  
1229 protected, and a telephone (audio-only) option will be available.

1230 **UPDATE 2020-06-30 – OPTIONAL TROUBLESHOOTING SOFTWARE:** As noted above,  
1231 participants will have the option to download the TeamViewer app to assist with EMA app troubleshooting.  
1232 The purpose of this software is to allow research staff to navigate to the EMA app and its settings to  
1233 address problems more quickly and remotely so participants are less likely to miss assessments which could  
1234 negatively impact their study eligibility and payment. The TeamViewer software will not be used for any  
1235 other purposes beyond addressing problems with the EMA app. Staff will not access private information on  
1236 the participant phone, such as photos, email, or texts messages, nor will they access functions such as the  
1237 phone's camera. Participants have the option to decline having this app installed on their device.  
1238 Additionally, the TeamViewer app requires the participant to actively consent to a troubleshooting session  
1239 by clicking a pop-up to allow access each time research staff requests a remote access session. The  
1240 participant can also end the remote session at any time.

1241 16.2 *Indicate how the research team is permitted to access any sources of information about the subjects.*

1242 *NOTE: Examples of appropriate responses include: school permission for review of records,*  
1243 *consent of the subject, HIPAA waiver. This question **does apply** to records reviews.*

1244 Response: Consent of the subject.

1245 **17.0 Data Management and Analysis**

1246 17.1 *Describe the data analysis plan, including any statistical procedures. This section applies to both*  
1247 *quantitative and qualitative analysis.*

1248 Response:

1249 Our primary outcome of interest (Aims 1 and 3) is smoking cessation, a dichotomous variable indicating  
1250 bio-verified (cotinine  $\leq 15$  ng/ml) self-report (TLFB) of continuous abstinence from smoking assessed at  
1251 end-of-treatment (weeks 8-11 post-quit) and long-term follow-up (weeks 8-26 post-quit). We also propose  
1252 to examine potential mechanisms of treatment effects, and our primary mediator of interest will be a  
1253 continuous variable representing percent reduction in smoking behavior (CPD from daily EMA  
1254 assessments) during the pre-quit phase of the study ( $[\text{Week -5 CPD} \text{ minus } \text{Week -1 CPD}] / \text{Week -5 CPD}$ ).  
1255 Our proposed analyses and power estimates focus on these primary measures.

1256 We focus above on percent reduction in CPD during the pre-quit period (from Week -5 to Week -1)  
1257 because this measure is both feasible to assess in clinical practice and is emphasized in prior work on pre-  
1258 quit pharmacotherapy (Hajek et al., 2011; Hawk et al., 2012, 2015; Rose et al., 1998). Indeed, some have  
1259 suggested that achieving a 50% pre-quit reduction in smoking may be a clinically useful target (e.g., Rose  
1260 & Behm, 2013), a hypothesis that could be evaluated in supplementary analyses.

1261 In addition, our assessment strategy will allow us to examine the time course of changes during the pre-quit  
1262 period in ways that may inform both theory and practice. This is true for reductions in CPD as well as the  
1263 other proposed mediators. In prior work with small samples, extended run-in varenicline had, on average, a  
1264 gradual impact on smoking and craving (Ashare et al., 2012; Hajek et al., 2011; Hawk et al., 2012; Poling  
1265 et al. 2010). We will explore these trajectories at the group level but also consider individual differences in

1266 change. For example, even among participants with comparable overall reductions in smoking, it is  
 1267 important to determine the degree to which abstinence is associated with a marked early decline in smoking  
 1268 (which may reflect a stronger blockade of reinforcement by pre-quit varenicline) or a more gradual  
 1269 reduction in smoking across the pre-quit period (which would allow more extinction “trials” to occur).

1270 Consideration of additional measures of key constructs. Similarly, we plan to explore models of patterns of  
 1271 change across multiple pre-quit variables that are proposed mediators and their relation to smoking  
 1272 outcome. Of particular interest is whether we can identify a group characterized by a decline in smoking  
 1273 during the pre-quit period that is accompanied by declines in smoking satisfaction and/or craving. If the  
 1274 mechanism of the extended run-in operates as we hypothesize, this pattern should be more likely in the  
 1275 extended run-in than the standard run-in treatment group and be predictive of abstinence. Such analysis  
 1276 would involve growth mixture modeling to identify groups based on trajectories of smoking, smoking  
 1277 satisfaction, and craving during the pre-quit phase. Our team has extensive experience to extend our  
 1278 proposed analysis to growth modeling and growth mixture modeling (Colder et al., 2002, 2006, 2013,  
 1279 2014; Trucco, Wright, & Colder, 2014).

1280 In addition, we will have a rich data set to examine a variety of alternative outcomes and potential  
 1281 mediators and moderators; examples are provided below. An advantage of our study is that it includes  
 1282 multiple measures of smoking intake (CPD, CO, COT and 3HC) and additional measures relevant to  
 1283 reinforcement and extinction (subjective effects of smoking; laboratory-based indices of the relative  
 1284 reinforcement from cigarettes, food, and water), and measures of alternative (though not mutually  
 1285 incompatible) mechanisms of treatment effects such as craving, withdrawal, and nausea. This provides  
 1286 broad coverage of the variables that are both theoretically relevant and empirically supported as key  
 1287 processes in abstinence and relapse. Another advantage of our study is that we have assessed many of our  
 1288 variables using multiple methods. To maximize conceptual clarity and reduce the number of statistical  
 1289 tests, we will use confirmatory factor analysis, including Multitrait-Multimethod Measurement Models  
 1290 (MTMM, Kenny & Kashy, 1992) when appropriate, to inform construction of within-domain composites  
 1291 and/or selection of a subset of secondary measures for analysis. For each of the aims, it will also be  
 1292 important to consider a range of potential moderators and covariates, such as degree of nicotine  
 1293 dependence, NMR, age, education, and treatment outcome expectancies.

1294 Primary analyses. Most of our analyses will be done in Mplus and SAS (Proc Mixed and Proc Glmmix),  
 1295 both of which are very flexible and can handle continuous, categorical, and non-normal data, and allow for  
 1296 the inclusion of cases with missing data.

1297 *Aim 1.* We hypothesize that bio-verified continuous abstinence rates at end-of-treatment and at long-term  
 1298 follow-up will be greater in the extended run-in group compared to the standard run-in group. Logistic  
 1299 regression will be used to test this aim. Abstinence will be regressed on treatment group (a binary  
 1300 indicator). Given evidence that extended pre-quit varenicline will be particularly helpful for women (Hawk  
 1301 et al., 2012), we will include gender and the gender x treatment interaction to evaluate the hypothesis that  
 1302 gender moderates the impact of varenicline run-in duration.

1303 *Aim 2.* We hypothesize that the extended run-in group will exhibit greater pre-quit reductions in smoking  
 1304 (percent reduction in CPD, as well as decreases in biochemical measures), as predicted by an extinction-of-  
 1305 reinforcement framework. Each hypothesized mediator will be regressed on treatment group (a binary  
 1306 indicator) using regression models appropriate for the nature of the mediator. As in Aim 1, gender and the  
 1307 gender x treatment group interaction will be included in the model. Comparable models will evaluate pre-  
 1308 quit changes in other candidate mediators (withdrawal, craving, subjective effects of smoking, nausea, and  
 1309 behavioral measures of smoking, food, and water reinforcement from the laboratory CBUC paradigm).  
 1310 Together, these analyses provide critical information about the degree to which run-in group differences in  
 1311 smoking reduction reflect smoking-specific changes in reinforcement and related constructs, such as  
 1312 reinforcer devaluation (i.e., from nausea). In addition to their conceptual and theoretical significance, a  
 1313 clearer understanding of treatment mechanism may be important for predicting success prior to quitting,  
 1314 thereby allowing adjustments to treatment to prevent patients from experiencing a failed quit attempt (e.g.,  
 1315 Rose et al., 2013) and providing precise targets to further enhance treatment effectiveness.

1316 *Aim 3.* We hypothesize that changes in pre-quit smoking behavior (i.e., percent reduction in CPD during  
 1317 the pre-quit period) will mediate the effect of extended pre-quit varenicline on smoking cessation. This aim  
 1318 will be tested with a path model whereby treatment will predict pre-quit reduction in smoking (a continuous

1319 variable), which in turn, will predict smoking abstinence. Separate models will be estimated for abstinence  
 1320 at EOT and 6M follow-up. Baseline levels of smoking will be included as a statistical control variable.  
 1321 Bootstrapped indirect effects with asymmetrical confidence bands will be used to test the proposed  
 1322 mediational path (MacKinnon 2008). We will also evaluate whether gender moderates this mediated path  
 1323 (moderated mediation, Preacher et al., 2007).

1324 *17.2 If applicable, provide a power analysis.*

1325 *NOTE: This may not apply to certain types of studies, including chart/records reviews, survey*  
 1326 *studies, or observational studies. This question is asked to elicit whether the investigator has an*  
 1327 *adequate sample size to achieve the study objectives and justify a conclusion.*

1328 Response: Although our analyses will utilize methods to handle missing data (e.g., full-information  
 1329 likelihood estimation; Enders & Bandalos, 2001), we conservatively estimated power based on N=320 ITT  
 1330 participants and attrition estimated to be 5% at TQD, 18% at EOT, and 25% at 6-M (based on our  
 1331 varenicline data from Hawk et al., 2012 and Lerman et al., 2015). Our power estimates are based on an  
 1332 alpha level of .05 and adequate power considered  $\geq .80$ . For the main effects of treatment run-in group on  
 1333 outcome (Aim 1) and hypothesized mediators (Aim 2), power was computed using Proc Power in SAS  
 1334 based on effect size estimates from Hawk et al. (2012) and Hajek et al. (2011); treatment run-in group  
 1335 effect sizes are expected to be in the range of small to medium for Aim 1 (Odds ratios 1.3 to 2.3) and Aim 2  
 1336 ( $f^2$  .05 to .12). Our proposed sample will provide adequate power to detect these effects. For gender  
 1337 interactions in Aims 1 and 2 and all effects in Aim 3, we estimated power using Monte Carlo simulations  
 1338 estimated in Mplus (Muthén, & Muthén, 2002) with 10,000 replications and parameters taken from our  
 1339 pilot study (Hawk et al., 2012). Our monte carlo simulation suggested adequate power to detect the  
 1340 proposed gender x treatment interactions, with minimal bias in the regression coefficients and  
 1341 corresponding standard errors (bias < 3%). For Aim 3, our Monte Carlo simulation suggested adequate  
 1342 power to detect the proposed mediational pathway (collapsing across gender) with minimal bias in the  
 1343 estimated indirect effect and corresponding standard error (bias < 2%). Furthermore, our Monte Carlo  
 1344 simulation suggested adequate power to detect the gender x treatment interaction predicting the proposed  
 1345 mediator, and the proposed indirect effect for women with minimal bias for these effects and the  
 1346 corresponding standard errors (bias < 1%). Hence, we have adequate power to detect moderated mediation.  
 1347 Please note that our power calculations are unusually strong in that all effect size estimates were based on  
 1348 existing data, rather than hypothetical estimates, which we believe provides greater confidence in our  
 1349 calculations.

1350 *17.3 Describe any procedures that will be used for quality control of collected data.*

1351 Response: As part of the data and safety monitoring process, the team will ensure that all fields are  
 1352 completed appropriately, and all corrections are done according to Good Clinical Practice (GCP). Any  
 1353 inconsistencies/deviations will be documented. The Study Physician will review inclusion/exclusion data  
 1354 for each participant, documenting reviews of each report. The Project Manager will conduct quality control  
 1355 reviews of data on an on-going basis.

## 1356 **18.0 Confidentiality**

### 1357 **A. Confidentiality of Study Data**

1358  
 1359 *Describe the local procedures for maintenance of confidentiality of study data and any records that will be*  
 1360 *reviewed for data collection.*

1361 *18.1 A. Where and how will all data and records be stored? Include information about: password*  
 1362 *protection, encryption, physical controls, authorization of access, and separation of identifiers and data, as*  
 1363 *applicable. Include physical (e.g. paper) and electronic files.*

1364 Response:

1368 Paper-based records, including source documents and an original consent form, will be maintained in  
 1369 locked filing cabinets in 306/307/308 Diefendorf Hall; keys are maintained in a safe in the office of the  
 1370 project-coordinator.

1371 All participants will be assigned a numeric code. Electronic assessments and data management will be set  
 1372 up on secure web-based programs: <https://ilumivu.com/solutions/ecological-momentary-assessment-app/>  
 1373 for daily EMA assessments and REDCap for electronic case report forms and overall project data  
 1374 management system. RedCap will temporarily be implemented through the University of Rochester CTSI.  
 1375 Due largely to the newness of our CTSA, UB does not have extensive RedCap support. UB CTSI COO  
 1376 Mary Sienkiewicz connected us with the U of Rochester CTSI (Carrie Irvine) for support. The websites are  
 1377 all HIPPA-compliant, have an SSL certificate (Secure Sockets Layer, a cryptographic protocol that  
 1378 provides communication security over the Internet), and use *https* (Hypertext Transfer Protocol Secure, a  
 1379 widely used communications protocol for secure communication over a computer network, with especially  
 1380 wide deployment on the Internet). No identifying information will be included in web-based electronic data  
 1381 files.

1382 Local computer files (such as the recruitment database and a file linking identifying information with each  
 1383 participant's unique numeric code) will be maintained on a secure, password-protected UB server subject to  
 1384 regular backup. Files will be accessible only by study investigators and staff. The videos will be stored  
 1385 (labeled only with ID#) in a password protected database, behind an electronic firewall, and will only be  
 1386 accessed by the research team.

1387 **UPDATE 2020-05-29 – COVID-19:**

1388 For any remote visits, all assessments will be labeled with the numeric code representing the participant ID;  
 1389 they will not be labeled with the participant's name or other PII.

1390 **UPDATE 2020-06-30 – OPTIONAL TROUBLESHOOTING SOFTWARE:** During remote  
 1391 troubleshooting sessions, research staff will document, for quality improvement purposes, basic  
 1392 smartphone information (e.g., model, operating system), the nature of the problem reported by the  
 1393 participant, steps taken to resolve the problem, and whether they were successful. No other information or  
 1394 data will be collected. According to the TeamViewer privacy policy, during remote access the software  
 1395 uses "...end-to-end encryption technology. This means that TeamViewer will not be aware of the content  
 1396 and subject matter of such exchanges." The TeamViewer software will collect and process information  
 1397 during remote access connection including "a Session ID, a meeting ID, and the start and end times of your  
 1398 session." No personal information is collected by the TeamViewer app during remote access sessions.

1399 *18.2 A. How long will the data be stored?*

1400 Response: Records containing identifying information will be stored for 3 years after completion of the  
 1401 project; they will then be destroyed.

1402 As described in our grant proposal (App00), we will follow the NIH mandate for data-sharing. Our data-  
 1403 sharing plan is consistent with the 2015 Institute of Medicine (IOM) report, *Sharing Clinical Trial Data:*  
 1404 *Maximizing Benefits, Minimizing Risk* (National Academies Press); we plan to make the full de-identified  
 1405 analyzable data set with metadata available through the National Addiction and HIV Data Archive Program  
 1406 (NAHDAP) within 18 months of study completion. NHADAP is a NIDA-funded platform for data sharing.  
 1407 As recommended by NHADAP, we will work with NHADAP staff to begin the data-sharing plan prior to  
 1408 beginning data collection so that maximal study data are available to the public without compromising  
 1409 participant protections. NAHDAP has a standard data deposit form and required list of files  
 1410 (<http://www.icpsr.umich.edu/icpsrweb/content/NAHDAP/deposit/index.html>). The data deposit includes a  
 1411 standard procedure for ensuring participant protections (including NAHDAP recoding or dropping  
 1412 variables that might compromise confidentiality).

1413 *18.3 A. Who will have access to the data?*

1414 Response: Access to source documents and identifying information will be limited to project investigators  
 1415 and staff.

1416 *18.4 A. Who is responsible for receipt or transmission of the data?*

1417 Response: Study investigators and staff.

1418 18.5 A. How will the data be transported?

1419 Response: N/A Data will not be physically transported.

1420 **B. Confidentiality of Study Specimens**

1421

1422 Describe the local procedures for maintenance of confidentiality of *study specimens*.

1423  N/A: No specimens will be collected or analyzed in this research.  
1424 (Skip to Section 19.0)

1425

1426 18.6 B. Where and how will all specimens be stored? Include information about: physical controls,  
1427 authorization of access, and labeling of specimens, as applicable.

1428 Response: Urine samples will be used immediately for on-site drug and pregnancy screening and then  
1429 discarded.

1430 As in our recent trial, and saliva samples will be collected in Diefendorf 329 by the Nurse/Phlebotomist.  
1431 Samples labeled with unique identifiers will be stored in Diefendorf 330 (which has both a key lock and an  
1432 alarm), in a -80C freezer until batch shipped to the University of Toronto for analysis, as detailed in App00.

1433 **UPDATE 2020-06-30 –OPTIONAL SALIVA SAMPLE FOR GENETIC ANALYSIS:**

1434 As stated in the consent addendum: “To protect your confidentiality, the DNA sample will be stored  
1435 without any identifying information, just an identification number. That number will be different from the  
1436 code used to identify other data you provide in the EVarQuit program. An electronic master list linking  
1437 your DNA identification number to your EVarQuit participation number will be password-protected and  
1438 stored securely, separate from your other information.”

1439 As with our other saliva samples (for cotinine and varenicline concentrations), the saliva sample for genetic  
1440 analysis will be assayed in the laboratory of Rachel Tyndale, Ph.D., at the University of Toronto. To  
1441 protect participant confidentiality, Dr. Tyndale will not have access to any participant data except the  
1442 uniquely coded samples.

1443  Samples are obtained, labeled, transferred, stored, and shipped according to detailed protocols. see  
1444 App10.3-03- Saliva\_Collection\_PNAT\_120111-1\_UB.pdf.

1445 18.7 B. How long will the specimens be stored?

1446 Response: All specimens will be destroyed after completion of assays described in the protocol/grant or  
1447 within one year of completion of the project, whichever comes first.

1448 **UPDATE 2020-06-30 –OPTIONAL SALIVA SAMPLE FOR GENETIC ANALYSIS:** Dr. Tyndale’s  
1449 lab will store the genetic samples for up to 10 years for future analysis for all participants who consent to  
1450 banking.

1451 18.8 B. Who will have access to the specimens?

1452 Response: PIs, project coordinator, study nurse/phlebotomist, and any other staff member trained in sample  
1453 acquisition or shipping.

1454 18.9 B. Who is responsible for receipt or transmission of the specimens?

1455 Response: PIs, project coordinator, study nurse/phlebotomist, and any other staff member trained in sample  
1456 acquisition or shipping.

1457 18.10 B. How will the specimens be transported?

1458 Response: Specimens will be shipped via overnight on dry ice, as in our previous trials.

1459 **19.0 Provisions to Monitor the Data to Ensure the Safety of Subjects**

1460  N/A: This study is not enrolling subjects, or is limited to records review procedures only. This  
1461 section does not apply.

- 1462  
1463  
1464 ***NOTE: Minimal risk studies may be required to monitor subject safety if the research procedures include procedures that present unique risks to subjects that require monitoring. Some examples include: exercising to exertion, or instruments that elicit suicidality or substance abuse behavior. In such cases, N/A is not an acceptable response.***  
1465  
1466  
1467  
1468  
1469 *19.1 Describe the plan to periodically evaluate the data collected regarding both harms and benefits to determine whether subjects remain safe.*
- 1470 Response: In this single-site trial, all participants receive varenicline (Chantix) for its approved use,  
1471 smoking cessation.
- 1472 Participant safety is a priority. The safety of individual participants will be assessed at each clinic visit, and  
1473 aggregate data will be reviewed annually by the study team and by the IRB.
- 1474 We will use a two-tiered system to assess potential side effects and adverse events. At each clinic visit,  
1475 participants will complete an established checklist of symptoms and an open-ended evaluation for potential  
1476 adverse events. Study staff will be trained to follow the procedures in App10-02 to trigger timely reporting  
1477 of side effects and potential AEs to the Study Physician. Participants will also be given information  
1478 (verbally and in a reminder wallet card) regarding how to contact the study personnel and under what  
1479 circumstances to proceed to the emergency department. At any time, participants will have the option to  
1480 stop taking the study medication and can drop out of the study if they desire. In addition, if any adverse  
1481 event requires treatment and follow-up, participants will be provided with appropriate referrals. The Study  
1482 Physician will determine the course of action for the subject reporting a serious adverse event (e.g.,  
1483 discontinuing medication, dose adjustment). The PI or Study Physician/Clinical Research Nurse will  
1484 clinically follow all subjects who are discontinued due to a serious adverse event until the event is resolved.
- 1485 In accordance with NIH and IRB guidelines, this study will employ the following mechanisms for adverse  
1486 event reporting: 1) alert the site IRBs of any and all reports of serious adverse events; 2) inform all  
1487 members of the study team of any and all reports of serious adverse events; and 3) notify NIH of any  
1488 actions taken by IRBs with regard to data safety monitoring. Detailed procedures are formalized in App10-  
1489 02.
- 1490 Although we considered establishing a formal DSMB, this does not appear to be warranted for the current  
1491 single-site trial that employs varenicline for its approved indication, smoking cessation. However, we do  
1492 plan to summarize and review rates of side effects, adverse events, and efficacy data – all blind to treatment  
1493 condition – as part of each renewal application to the IRB.
- 1494 *19.2 Describe what data are reviewed, including safety data, untoward events, and efficacy data.*
- 1495 Response: Standard assessments of side effects, detailed records of adverse events, and overall rates of  
1496 smoking cessation.
- 1497 *19.3 Describe any safety endpoints.*
- 1498 Response: Standard assessments of side effects, detailed records of adverse events.
- 1499 *19.4 Describe how the safety information will be collected (e.g., with case report forms, at study visits, by  
1500 telephone calls with participants).*
- 1501 Response: With case report forms at study visits.
- 1502 *19.5 Describe the frequency of safety data collection.*
- 1503 Response: At all 6 clinic visits, which occur at 1- to 2-week intervals in the first 2 months of treatment.
- 1504 *19.6 Describe who will review the safety data.*
- 1505 Response: As detailed in App10-02, study staff will review side effect reports at each study visit; standard  
1506 decision rules are used to trigger reporting to the PI/Study Physician within 24 hours (often within  
1507 minutes).
- 1508 *19.7 Describe the frequency or periodicity of review of cumulative safety data.*



1509 Response: Annually.

1510 19.8 Describe the statistical tests for analyzing the safety data to determine whether harm is occurring.

1511 Response: N/A. The base rates of serious adverse events are too small to be detected by statistical tests in  
1512 the proposed sample size.

1513 19.9 Describe any conditions that trigger an immediate suspension of the research.

1514 Response: Given the nature of the trial, it is hard to foresee conditions that would lead to immediate  
1515 suspension of the research. However, we would seek IRB input to consider immediate suspension if there  
1516 were more than 2 SAEs (Codes 3 and 4 in App10-02) determined to be probably/definitely related to study  
1517 participation during a single calendar month.

1518

## 1519 20.0 Withdrawal of Subjects

1520  N/A: This study is not enrolling subjects. This section does not apply.

1521

1522 20.1 Describe **anticipated** circumstances under which subjects may be withdrawn from the research  
1523 without their consent.

1524 Response: As described in the informed consent document:

1525 Can I be removed from the research without my OK?

1526 The principal investigator of the study can remove you from the research study without your approval.  
1527 Possible reasons for removal include:

- 1528 • The Principal Investigators feel it is necessary for your health or safety. Such an action would not  
1529 require your consent, but you would be informed if such a decision was made and the reason for this  
1530 decision.
- 1531 • You have not followed program requirements.
- 1532 • The Sponsor, University, or Investigators have decided to stop the program.

1533 20.2 Describe any procedures for orderly termination.

1534 *NOTE: Examples may include return of study drug, exit interview with clinician. Include whether*  
1535 *additional follow up is recommended for safety reasons for physical or emotional health.*

1536 Response: PI or designee will attempt to inform participants (by phone; if unable to contact, then by postal  
1537 service) of the reason for withdrawal. No additional follow-up is necessary; however, in some situations it  
1538 may be reasonable to provide alternative referral information, as discussed in other sections of the protocol.

1539 20.3 Describe procedures that will be followed when subjects withdraw from the research, including  
1540 retention of already collected data, and partial withdrawal from procedures with continued data  
1541 collection, as applicable.

1542 Response: As described in App10-02: “For all side effects that require attention, the site physician,  
1543 qualified medical staff and PI will determine a course of action (i.e., continuation and monitoring, dose  
1544 reduction, subject withdrawal). All side effects that are considered a Serious Adverse Event (see below)  
1545 will be reported to PIs and IRBs ..., as well as to the FDA and NIH (see below for protocol for adverse  
1546 event reporting)... PIs and Study Physicians will determine if any serious adverse event requires additional  
1547 care. Such events may be referred to the out-patient department ... or to the emergency department ...  
1548 (...have access to 24-hour emergency services, including extensive in-patient and out-patient services for  
1549 psychiatric conditions).”

1550

1551 **UPDATE 2020-06-30 – OPTIONAL SALIVA SAMPLE FOR GENETIC ANALYSIS:** As also noted  
1552 in Procedures and explicitly stated in the consent addendum: “If you say yes now, but you change your

1553 mind later, it will not be held against you or affect your participation in EVarQuit. You can always call  
 1554 (716-829-2323) or email us (EVarQuit@buffalo.edu) to say that you have changed your mind, and the  
 1555 DNA sample will be destroyed.” In such an event, the PI (Dr. Hawk) will contact Dr. Tyndale at the  
 1556 University of Toronto to ensure the deidentified sample is destroyed.

1557

## 1558 **21.0 Risks to Subjects**

1559 *21.1 List the reasonably foreseeable risks, discomforts, hazards, or inconveniences to the subjects related*  
 1560 *to their participation in the research. Consider physical, psychological, social, legal, and economic*  
 1561 *risks. Include a description of the probability, magnitude, duration, and reversibility of the risks.*

1562 *NOTE: Breach of confidentiality is always a risk for identifiable subject data.*

1563 Response: The potential risks to participants, and their likelihood and seriousness, are described below.  
 1564 Participants can choose, as an alternative, to not enroll in this study. Overall, there is minimal risk for  
 1565 serious adverse reactions as a consequence of enrolling in this study.

1566 Assessments. Subjects may experience emotional distress during assessments from discussing feelings and  
 1567 attitudes about smoking or from learning about the risks from smoking. These events happen very rarely  
 1568 and in almost all cases are short-lived and of low intensity, lasting for 1-2 weeks. Study personnel will be  
 1569 alerted to expect this from a small number of subjects and will be trained to make referrals for mental  
 1570 health services as needed. Personnel will be trained to query for adverse emotional reactions during  
 1571 assessments and will be trained to deal with such reactions and to provide additional referrals if needed. In  
 1572 addition, if assessments indicate psychiatric concerns, referrals to appropriate psychological services will  
 1573 be provided.

1574 Withdrawal symptoms following cessation. Most participants will experience some nicotine withdrawal  
 1575 upon quitting. Symptoms include craving, anxiety, irritability, problems concentrating, appetite change and  
 1576 weight gain, and insomnia. Because all subjects will use varenicline, withdrawal severity should be  
 1577 reduced. Moreover, withdrawal symptoms typically decrease markedly within 1-2 weeks. Study counseling  
 1578 will advise participants of these symptoms and discuss methods to cope with them.

1579 Varenicline. In clinical trials, the most common side effects of Chantix include: nausea, sleep problems  
 1580 (trouble sleeping, changes in dreaming), constipation, gas, and vomiting. Chantix may also contribute to  
 1581 difficult sleeping, vivid, unusual, or strange dreams. Participants will be informed of the need to use  
 1582 caution driving or operating machinery until they are comfortable with how Chantix might affect them.  
 1583 Chantix should not be used with other quit-smoking products.

1584 Some people have had reported changes in behavior, including hostility, agitation, depressed mood,  
 1585 suicidal thoughts or actions while using Chantix to help them quit smoking, with these symptoms  
 1586 developing when they began taking Chantix, and on occasion after several weeks of treatment or even after  
 1587 stopping Chantix. Participants will be counseled on these potential risks and encourage to contact us if they  
 1588 and/or their family/friends notice agitation, hostility, depression, or changes in behavior, thinking, or mood  
 1589 that are not typical, or if they develop suicidal thoughts or actions, anxiety, panic, aggression, anger, mania,  
 1590 abnormal sensations, hallucinations, paranoia, or confusion.

1591 Varenicline also carries “warnings and precautions” regarding cardiovascular events, interactions with  
 1592 alcohol, seizures, and accidental injury. Varenicline may be associated with an increased risk of certain  
 1593 cardiac and vascular side effects, including chest pain, heart attack, and stroke. These risks are rare and are  
 1594 still being studied to determine how real they are. However, our study staff follows strict procedures to  
 1595 monitor for the presence of these side effects, including monitoring blood pressure at each in person visit  
 1596 and asking specific side effect questions related to cardiovascular events (e.g. chest pain, weakness on one  
 1597 side, etc) during each telephone session.

1598 Because varenicline safety for an unborn baby is unknown, participants who are pregnant or nursing a  
 1599 baby, or planning to become pregnant, will be excluded from participation. All women of childbearing  
 1600 potential must agree to use an adequate form of contraception throughout the study and will be asked to  
 1601 take a pregnancy test at study intake. Women who become pregnant during the study will be removed from  
 1602 varenicline therapy but may still participate in counseling and study follow-up.

1603 Threats to privacy/confidentiality. Since self-report and biological data will be collected and stored as part  
1604 of this study, it is possible that subject privacy or confidentiality can be threatened.

1605

1606 **UPDATE 2020-05-29 - COVID-19:**

1607 In the context of the pandemic, any interaction with another person or objects they have touched carries  
1608 some risk of transmission of SARS-CoV-2, the virus that causes COVID-19.

1609 In the case of remote visits, it is possible that subject privacy or confidentiality can be threatened.

1610 21.2 *Describe procedures performed to lessen the probability or magnitude of risks, including procedures*  
1611 *being performed to monitor subjects for safety.*

1612 Response:

1613 To further minimize the likelihood and severity of the aforementioned risks of varenicline:

1614 1. We will employ select exclusionary criteria. For example, potential participants will be screened for  
1615 current suicidal behavior and severe mood disorder and for very high levels of alcohol consumption.

1616 2. We will administer the standard varenicline dose run-in and will not exceed the standard dose of 1 mg  
1617 B.I.D.

1618 3. We will discuss the potential risks of varenicline with prospective participants, including their likelihood.  
1619 We will monitor self-reported side effects and Adverse Events at each of the clinic visits during the  
1620 treatment period. Study Physician /PI will be alerted to side effects /Adverse Events, following our  
1621 standardized protocol (see App10-02). The Study MD/PI will review the information provided by the  
1622 research staff and if applicable, will contact the study participant directly to gather more information and  
1623 determine the appropriate course of action for the subject. Ultimately, the Study Physician will decide if the  
1624 AE is related to study medication and whether the subject should discontinue taking study medication.

1625  
1626 To protect privacy and confidentiality, we have several safeguards against unauthorized access to study  
1627 data – please see the sections of Privacy and Confidentiality sections of this document for details. We have  
1628 not experienced the unauthorized use of study data.

1629 Procedures for monitoring subjects for safety are presented in detail in Section 19.

1630 **UPDATE 2020-05-29: COVID-19:**

1631 Please see Section 11.1, above, for our extensive procedures to mitigate risk of transmission of SARS-  
1632 CoV-2, the virus that causes COVID-19, as well as our monitoring for COVID-19 symptoms.

1633 21.3 *If applicable, indicate **which procedures** may have risks to the subjects that are currently*  
1634 *unforeseeable.*

1635 Response: There may be risks that we do not know about at this time. We will notify participants of any  
1636 new information that may affect their willingness to continue participation in this study.

1637 21.4 *If applicable, indicate which research procedures may have risks to an embryo or fetus should the*  
1638 *subject be or become pregnant.*

1639 Response: Because varenicline safety for an unborn baby is unknown, participants will be told that they  
1640 should not become pregnant while on this study. Women on the study should not nurse a baby. If the  
1641 woman is of childbearing potential, she must use an adequate form of contraception while study medication  
1642 is being taken and for at least one month after the end of the trial. If the woman is pregnant or breast  
1643 feeding, she may not participate in this study, and if she becomes pregnant during the study, she will be  
1644 removed from the study. Women will be asked to take a pregnancy test before starting the study.

1645 21.5 *If applicable, describe risks to others who are not subjects.*

1646 Response: We are not aware of any risks of this research to others who are not subjects.

1647  
 1648  
 1649  
 1650  
 1651  
 1652  
 1653  
 1654  
 1655  
 1656  
 1657  
 1658  
 1659  
 1660  
 1661  
 1662  
 1663  
 1664  
 1665  
 1666  
 1667  
 1668  
 1669  
 1670  
 1671  
 1672  
 1673  
 1674  
 1675  
 1676  
 1677  
 1678  
 1679  
 1680  
 1681  
 1682  
 1683  
 1684  
 1685  
 1686  
 1687  
 1688

## 22.0 Potential Benefits to Subjects

22.1 *Describe the potential benefits that individual subjects may experience by taking part in the research. Include the probability, magnitude, and duration of the potential benefits. Indicate if there is no direct benefit.*

*NOTE: Compensation cannot be stated as a benefit.*

Response: As described in the consent form –

“Will being in this study help me in any way?”

We cannot promise any benefits to you or others from your taking part in this research. However, possible benefits include learning more about your smoking habit and quitting smoking. All participants receive free smoking cessation counseling and the most effective smoking cessation medication currently available (varenicline).

This clinical research study may show us how to make it easier for other smokers to quit smoking with varenicline in the future.”

## 23.0 Compensation for Research-Related Injury

**N/A:** The research procedures for this study do not present risk of research related injury (e.g. survey studies, records review studies). This section does not apply.

23.1 *If the research procedures carry a risk of research related injury, describe the available compensation to subjects in the event that such injury should occur.*

Response: As described in the consent form, under What else do I need to know?:

It is important that you tell your study doctor if you feel that you have been injured because of taking part in this study. You can tell the doctor in person or call. You will get medical treatment if you are injured as a result of taking part in this study. Your study doctor will explain the treatment options to you and tell you where you can get treatment. Generally, this care will be billed to you, your insurance or other third party. The University at Buffalo has no program to pay for medical care for research-related injury.

23.2 *Provide a copy of contract language, if any, relevant to compensation for research related injury.*

*NOTE: If the contract is not yet approved at the time of this submission, submit the current version here. If the contract is later approved with different language regarding research related injury, you must modify your response here and submit an amendment to the IRB for review and approval.*

Response: N/A – There is no contract other than the consent form.

## 24.0 Economic Burden to Subjects

24.1 *Describe any costs that subjects may be responsible for because of participation in the research.*

*NOTE: Some examples include transportation or parking.*

Response: Free parking will be made available, so that is not an issue.

As described in the consent form: “Neither you nor your insurance provider will be charged for costs of any of the procedures performed for the purpose of this research study (e.g., screening procedures, experimental procedures, medication, counseling, monitoring/follow-up procedures described above).”

**N/A:** This study is not enrolling subjects, or is limited to records review procedures only. This section does not apply.

## 25.0 Compensation for Participation

25.1 *Describe the amount and timing of any compensation to subjects, including monetary, course credit, or gift card compensation.*

1689 Response:

1690 As detailed in the consent form, under What else do I need to know:

1691 **Prior to 2019-11 modification approval in early 2020-01:**

1692 If you agree to take part in this research study, we will pay you up to \$599 for your time and  
 1693 effort. Although you will not receive any compensation for the initial health screening, we will  
 1694 pay you \$15 for completing each of the 6 clinic visits in which you receive treatment. For each of  
 1695 the two lab visits, we will pay you up to \$47. In return for completing electronic daily assessments  
 1696 on a phone or tablet, you can earn up to \$315 over a 9-week period.

1697 Because it is particularly important for us to know how you are doing after the treatment ends, we  
 1698 will pay you \$15 for completing a brief phone call at 3 months after the planned quit date, and \$15  
 1699 for a 6- month call. During each of those 2 calls, we may ask you to come back to UB to provide a  
 1700 saliva sample and complete a few additional measures, for which you would receive an additional  
 1701 \$35 each time.

1702 **Beginning with 2019-11 modification submission (implemented early 2020-01):**

1703 If you agree to take part in this research study, we will pay you up to \$598 for your time and  
 1704 effort. Although you will not receive any compensation for the initial health screening, we will  
 1705 pay you for your time and effort in completing other project requirements. For each of the two 2-  
 1706 hour lab visits, we will pay you up to \$54. In return for completing electronic daily assessments on  
 1707 a phone or tablet, you can earn up to \$315 over a 9-week period (\$1 per completion for each of the  
 1708 35 assessments per week).

1709 Because it is particularly important for us to know how you are doing over time, we will pay you  
 1710 up to \$25 for completing a 1-minute computerized survey sent to your phone at 6, 8, 10, 18, and  
 1711 22 weeks after your Target Quit Date (\$5 for each of the 5 surveys). You may also be asked to  
 1712 come back to Diefendorf Hall to provide breath and saliva samples and complete a few surveys at  
 1713 11 and 26 weeks after your Target Quit Date; you would receive \$75 for each of those visits.

1714 **UPDATE 2020-06, to reflect elimination of lab visits:**

1715 If you agree to take part in this research study, we will pay you up to \$490 for your time and  
 1716 effort. Although you will not receive any compensation for the initial health screening, we will  
 1717 pay you for your time and effort in completing other project requirements. In return for completing  
 1718 electronic daily assessments on a phone or tablet, you can earn up to \$315 over a 9-week period  
 1719 (\$1 per completion for each of the 35 assessments per week).

1720 Because it is particularly important for us to know how you are doing over time, we will pay you  
 1721 up to \$25 for completing a 1-minute computerized survey sent to your phone at 6, 8, 10, 18, and  
 1722 22 weeks after your Target Quit Date (\$5 for each of the 5 surveys). You may also be asked to  
 1723 come back to Diefendorf Hall to provide breath and saliva samples and complete a few surveys at  
 1724 11 and 26 weeks after your Target Quit Date; you would receive \$75 for each of those visits.

1725  
 1726 Payments will be made with a reimbursable Mastercard (ClinCard), typically at the end of each visit.  
 1727 Although we will not require you to complete tax forms, federal law requires that you report all income to  
 1728 the Internal Revenue Service (IRS).

1729  
 1730 **UPDATE 2020-06-30 – OPTIONAL SALIVA SAMPLE FOR GENETIC ANALYSIS:** As stated in the  
 1731 consent addendum, participants who can provide the optional sample on site will receive \$25. Participants  
 1732 who complete and mail the sample from home will receive a higher amount of remuneration, \$50, because  
 1733 of the additional requirements for collection, preparing the package to mail, and mailing the package.

1734

1735  N/A: This study is not enrolling subjects, or is limited to records review procedures only. This  
 1736 section does not apply.

1737  N/A: There is no compensation for participation. This section does not apply.

1738

## 1739 26.0 Consent Process

1740 26.1 *Indicate whether you will be obtaining consent.*

1741 *NOTE: This does not refer to consent documentation, but rather whether you will be obtaining*  
 1742 *permission from subjects to participate in a research study.*

1743 *Consent documentation is addressed in Section 27.0.*

1744  **Yes** *(If yes, Provide responses to each question in this Section)*

1745  **No** *(If no, Skip to Section 27.0)*

1746

1747 26.2 *Describe where the consent process will take place. Include steps to maximize subjects' privacy.*

1748 Response: Consenting will take place in Diefendorf Hall, Rooms 307/308. An individual overview will be  
 1749 followed by consenting of individual participants.

1750 **UPDATE 2020-06-30 – OPTIONAL SALIVA SAMPLE FOR GENETIC ANALYSIS:** Participants will  
 1751 be consented individually either in a private interview room on the third floor of Diefendorf Hall or, if all  
 1752 study visits are complete, will have the consent addendum mailed to them for their review at home;  
 1753 questions will be addressed in person, by email, and/or by phone, as needed and preferred by the  
 1754 participant.

1755 26.3 *Describe how you will ensure that subjects are provided with a sufficient period of time to consider*  
 1756 *taking part in the research study.*

1757 *NOTE: It is always a requirement that a prospective subject is given sufficient time to have their*  
 1758 *questions answered and consider their participation. See “SOP: Informed Consent Process for*  
 1759 *Research (HRP-090)” Sections 5.5 and 5.6.*

1760 Response: After the overview, participants will be invited to take as much time as they like to read the  
 1761 consent form and to ask any questions that they may have. Participants may also take the protocol home  
 1762 with them to review and/or discuss with family, physician, etc.; in this case, the participant would contact  
 1763 us to schedule their intake visit, where we would complete the consent process. Data collection will not  
 1764 begin until the participant has agreed to participate and signed the consent form.

1765 26.4 *Describe any process to ensure ongoing consent, defined as a subject's willingness to continue*  
 1766 *participation for the duration of the research study.*

1767 Response: Although we will obtain written consent only once in this relatively short term study (each  
 1768 participant is active in the study for ~1 year), participants who raise concerns about continuing participation  
 1769 will always be reminded that they are free to withdraw from the study at any time.

1770 26.5 *Indicate whether you will be following “SOP: Informed Consent Process for Research (HRP-090).”*  
 1771 *If not, or if there are any exceptions or additional details to what is covered in the SOP, describe:*

- 1772 • *The role of the individuals listed in the application who are involved in the consent process*
- 1773 • *The time that will be devoted to the consent discussion*
- 1774 • *Steps that will be taken to minimize the possibility of coercion or undue influence*
- 1775 • *Steps that will be taken to ensure the subjects' understanding*

1776 Response: Yes, we will follow SOP HRP-090. In particular, we draw attention to sections 4, 5.1, 5.4, 5.5,  
 1777 5.6, 5.7, 5.8, 5.9, 5.10.3, and 6.1, 6.5.

1778  We have reviewed and will be following “SOP: Informed Consent Process for Research (HRP-  
 1779 090).”

1780 ***Non-English Speaking Subjects***

1781  N/A: This study will not enroll Non-English speaking subjects.  
1782 (Skip to Section 26.8)

1783 26.6 *Indicate which language(s) other than English are likely to be spoken/understood by your*  
1784 *prospective study population or their legally authorized representatives.*

1785  
1786 *NOTE: The response to this Section should correspond with your response to Section 6.4 of this*  
1787 *protocol.*

1788 Response:

1789 26.7 *If subjects who do not speak English will be enrolled, describe the process to ensure that the oral*  
1790 *and written information provided to those subjects will be in that language. Indicate the language*  
1791 *that will be used by those obtaining consent.*

1792 *NOTE: Guidance is provided on “SOP: Informed Consent Process for Research (HRP-090).”*

1793 Response:

1794

1795 ***Cognitively Impaired Adults***

1796  N/A: This study will not enroll cognitively impaired adults.  
1797 (Skip to Section 26.9)

1798 26.8 *Describe the process to determine whether an individual is capable of consent.*

1799 Response:

1800

1801 ***Adults Unable to Consent***

1802  N/A: This study will not enroll adults unable to consent.  
1803 (Skip to Section 26.13)

1804 *When a person is not capable of consent due to cognitive impairment, a legally authorized representative*  
1805 *should be used to provide consent (Sections 26.9 and 26.10) and, where possible, assent of the individual*  
1806 *should also be solicited (Sections 26.11 and 26.12).*

1807 26.9 *Describe how you will identify a Legally Authorized Representative (LAR). Indicate that you have*  
1808 *reviewed the “SOP: Legally Authorized Representatives, Children, and Guardians (HRP-013)” for*  
1809 *research in New York State.*

1810 *NOTE: Examples of acceptable response includes: verifying the electronic medical record to*  
1811 *determine if an LAR is recorded.*

1812 Response:

1813  We have reviewed and will be following “SOP: Legally Authorized Representatives, Children,  
1814 and Guardians (HRP-013).”

1815 26.10 ***For research conducted outside of New York State, provide information that describes which***  
1816 ***individuals are authorized under applicable law to consent on behalf of a prospective subject to***  
1817 ***their participation in the research. One method of obtaining this information is to have a legal***  
1818 ***counsel or authority review your protocol along with the definition of “legally authorized***  
1819 ***representative” in “SOP: Legally Authorized Representatives, Children, and Guardians (HRP-***  
1820 ***013).”***

1821 Response:

1822 26.11 *Describe the process for assent of the adults:*

- 1823 • Indicate whether assent will be obtained from all, some, or none of the subjects. If some,  
1824 indicate which adults will be required to assent and which will not.

1825 Response:

- 1826 • If assent will not be obtained from some or all subjects, provide an explanation of why not.

1827 Response:

- 1828 26.12 Describe whether **assent of the adult** subjects will be documented and the process to document  
1829 assent.

1830 NOTE: The IRB allows the person obtaining assent to document assent on the consent document  
1831 using the “Template Consent Document (HRP-502)” Signature Block for Assent of Adults who are  
1832 Legally Unable to Consent.

1833 Response:

1834 **Subjects who are not yet Adults (Infants, Children, and Teenagers)**

- 1835  N/A: This study will not enroll subjects who are not yet adults.  
1836 (Skip to Section 27.0)

- 1837 26.13 Describe the criteria that will be used to determine **whether a prospective subject has not attained**  
1838 **the legal age for consent to treatments or procedures involved in the research** under the applicable  
1839 law of the jurisdiction in which the research will be conducted (e.g., **individuals under the age of 18**  
1840 **years**). For research conducted in NYS, review “SOP: Legally Authorized Representatives,  
1841 Children, and Guardians (HRP-013)” to be aware of which individuals in the state meet the  
1842 definition of “children.”

1843 NOTE: Examples of acceptable responses include: verification via electronic medical record,  
1844 driver’s license or state-issued ID, screening questionnaire.

1845 Response:

- 1846 26.14 **For research conducted outside of New York State**, provide information that describes which  
1847 persons have not attained the legal age for consent to treatments or procedures involved the  
1848 research, under the applicable law of the jurisdiction in which research will be conducted. One  
1849 method of obtaining this information is to have a legal counsel or authority review your protocol  
1850 along the definition of “children” in “SOP: Legally Authorized Representatives, Children, and  
1851 Guardians (HRP-013).”

1852 Response:

- 1853 26.15 Describe whether parental permission will be obtained from:

1854 Response:

- 1855  One parent even if the other parent is alive, known, competent, reasonably available, and shares  
1856 legal responsibility for the care and custody of the child.
- 1857  Both parents unless one parent is deceased, unknown, incompetent, or not reasonably available, or  
1858 when only one parent has legal responsibility for the care and custody of the child.
- 1859  Parent permission will not be obtained. A waiver of parent permission is being requested.

1860 NOTE: The requirement for parent permission is a protocol-specific determination made by the IRB  
1861 based on the risk level of the research. For guidance, review the “CHECKLIST: Children (HRP-  
1862 416).”

- 1863 26.16 Describe whether permission will be obtained from individuals **other than parents**, and if so, who  
1864 will be allowed to provide permission. Describe your procedure for determining an individual’s  
1865 authority to consent to the child’s general medical care.



1866 Response:

1867 26.17 Indicate whether assent will be obtained from all, some, or none of the **children**. If assent will be  
1868 obtained from some children, indicate which children will be required to assent.

1869 Response:

1870 26.18 When assent of children is obtained, describe how it will be documented.

1871 Response:

1872

## 1873 27.0 Waiver or Alteration of Consent Process

1874 **Consent will not be obtained, required information will not be disclosed, or the research involves**  
1875 **deception.**

1876  N/A: A waiver or alteration of consent is not being requested.

1877 27.1 If the research involves a waiver or alteration of the consent process, please review the  
1878 “CHECKLIST: Waiver or Alteration of Consent Process (HRP-410)” to ensure that you have  
1879 provided sufficient information for the IRB to make the determination that a waiver or alteration can  
1880 be granted.

1881 *NOTE: For records review studies, the first set of criteria on the “CHECKLIST: Waiver or*  
1882 *Alteration of Consent Process (HRP-410)” applies.*

1883 Response:

1884 27.2 If the research involves a waiver of the consent process for planned emergency research, please  
1885 review the “CHECKLIST: Waiver of Consent for Emergency Research (HRP-419)” to ensure you  
1886 have provided sufficient information for the IRB to make these determinations. Provide any  
1887 additional information necessary here:

1888 Response:

1889

## 1890 28.0 Process to Document Consent

1891  N/A: A Waiver of Consent is being requested.  
1892 (Skip to Section 29.0)

1893 28.1 Indicate whether you will be following “SOP: Written Documentation of Consent (HRP-091).” If not  
1894 or if there are any exceptions, describe whether and how consent of the subject will be obtained  
1895 including whether or not it will be documented in writing.

1896 *NOTE: If your research presents no more than minimal risk of harm to subjects and involves no*  
1897 *procedures for which written documentation of consent is normally required outside of the research*  
1898 *context, the IRB will generally waive the requirement to obtain written documentation of consent.*  
1899 *This is sometimes referred to as ‘verbal consent.’ Review “CHECKLIST: Waiver of Written*  
1900 *Documentation of Consent (HRP-411)” to ensure that you have provided sufficient information.*

1901  If you will document consent in writing, attach a consent document with your submission. You  
1902 may use “TEMPLATE CONSENT DOCUMENT (HRP-502)”. If you will obtain consent, but  
1903 not document consent in writing, attach the script of the information to be provided orally or in  
1904 writing (i.e. consent script or Information Sheet).

1905 Response:

1906  Informed consent is App28-InformedConsentWithHIPPA—EvarQuit-2016-09-26

1907  We will be following “SOP: Written Documentation of Consent” (HRP-091).

- 1908 **Update 2020-5-21 – Further assessing COVID-19 impact:** Verbal consent will be obtained for newly  
1909 implemented procedures for this survey only.
- 1910 **Update 2020-5-29 - COVID-19-related procedural changes:** A consent addendum (EVarQuit Consent  
1911 Addendum – COVID-19.docx) to be read, discussed, and signed at the Intake Visit, describes all COVID-  
1912 related requirements and procedures.
- 1913 **UPDATE 2020-06-30 – OPTIONAL SALIVA SAMPLE FOR GENETIC ANALYSIS:** As described in  
1914 Procedures, an optional consent addendum (EVarQuit Genetics Sub-Study - Consent Addendum - onsite -  
1915 2020-06-30.docx OR EVarQuit Genetics Sub-Study - Consent Addendum - home - 2020-06-30.docx) will  
1916 be read, discussed, and signed at Clinic 2 or later (and always prior to obtaining the optional saliva sample  
1917 for genetic analysis). The consent addendum addresses the requirements of Section 4 of HRP-399 –  
1918 Additional Requirements for Genetic Testing (NY State) and the procedure for withdrawal of consent and  
1919 destruction of samples (see Section 2 of HRP-399).

1920  
1921

### 29.0 Multi-Site Research (Multisite/Multicenter Only)

- 1922  N/A: This study is not an investigator-initiated multi-site study. This section does not apply.  
1923

1924 29.1 *If this is a multi-site study **where you are the lead investigator**, describe the processes to ensure*  
1925 *communication among sites, such as:*

- 1926 • *All sites have the most current version of the IRB documents, including the protocol, consent*  
1927 *document, and HIPAA authorization.*
- 1928 • *All required approvals have been obtained at each site (including approval by the site’s IRB*  
1929 *of record).*
- 1930 • *All modifications have been communicated to sites, and approved (including approval by the*  
1931 *site’s IRB of record) before the modification is implemented.*
- 1932 • *All engaged participating sites will safeguard data as required by local information security*  
1933 *policies.*
- 1934 • *All local site investigators conduct the study appropriately.*
- 1935 • *All non-compliance with the study protocol or applicable requirements will be reported in*  
1936 *accordance with local policy.*

1937 Response:

1938 29.2 *Describe the method for communicating to engaged participating sites:*

- 1939 • *Problems*
- 1940 • *Interim results*
- 1941 • *Study closure*

1942 Response:

1943 29.3 *Indicate the total number of subjects that will be enrolled or records that will be reviewed across*  
1944 *all sites.*

1945 Response:

1946 29.4 *If this is a multicenter study for which UB will serve as the IRB of record, and subjects will be*  
1947 *recruited by methods not under the control of the local site (e.g., call centers, national advertisements)*  
1948 *describe those methods.*

1949 Response:

1950  
1951

### 30.0 Banking Data or Specimens for Future Use

1952  N/A: This study is not banking data or specimens for future use or research outside the scope of the  
 1953 present protocol. This section does not apply.

1954 30.1 *If data or specimens will be banked (stored) for future use, that is, use or research outside of the*  
 1955 *scope of the present protocol, describe where the data/specimens will be stored, how long they will*  
 1956 *be stored, how the data/specimens will be accessed, and who will have access to the data/specimens.*

1957 *NOTE: Your response here must be consistent with your response at the “What happens if I say yes,*  
 1958 *I want to be in this research?” Section of the Template Consent Document (HRP-502).*

1959 Response:

1960 **UPDATE 2020-06-30 – OPTIONAL SALIVA SAMPLE FOR GENETIC ANALYSIS:** With  
 1961 participant consent (see consent addendum), the DNA saliva sample will be banked in the lab of Dr. Rachel  
 1962 Tyndale at the University of Toronto (Room 4326, 1 King’s College Circle, University of Toronto,  
 1963 Toronto, Ontario M5S 1A8, Canada) for up to 10 years for additional genetic analysis. Dr. Tyndale is a  
 1964 Professor of Pharmacology and Toxicology and the Head of Pharmacogenomics at the Centre for Addiction  
 1965 and Mental Health. As noted above, the sample will be stored without any additional information. No one  
 1966 will have access to the genetic data/specimens without permission of Dr. Tyndale, with prior approval from  
 1967 EVarQuit PIs Hawk/Mahoney.

1968 30.2 *List the data to be stored or associated with each specimen.*

1969 Response:

1970 **UPDATE 2020-06-30 – OPTIONAL SALIVA SAMPLE FOR GENETIC ANALYSIS:** None. No data  
 1971 will be stored or associated with each sample.

1972 30.3 *Describe the procedures to release banked data or specimens for future uses, including: the process*  
 1973 *to request a release, approvals required for release, who can obtain data or specimens, and the data*  
 1974 *to be provided with specimens.*

1975 Response:

1976 **UPDATE 2020-06-30 – OPTIONAL SALIVA SAMPLE FOR GENETIC ANALYSIS:** No banked  
 1977 sample will be released/analyzed without prior IRB approval. As noted in 31.2, no data are stored with each  
 1978 sample.

### 1979 31.0 Drugs or Devices

1980  N/A: This study does not involve drugs or devices. This section does not apply.

1981 31.1 *If the research involves drugs or devices, list and describe all drugs and devices used in the*  
 1982 *research, the purpose of their use, and their regulatory approval status.*

1983 Response: All participants will receive varenicline (Chantix) for its FDA-approved indication, smoking  
 1984 cessation.

1985 31.2 *Describe your plans to store, handle, and administer those drugs or devices so that they will be used*  
 1986 *only on subjects and be used only by authorized investigators.*

1987 Response: Pfizer will provide all study medication for the trial. As in our previous trials, the UB Research  
 1988 Pharmacy (in the school of Pharmacy and Pharmaceutical Sciences) will receive all study medication from  
 1989 Pfizer and will oversee medication packaging, dispensing, accountability logs at study visits, and eventual  
 1990 destruction of unused medication. The Pharmacy has an alarmed room on site (Diefendorf Hall, Room 330)  
 1991 for on-site storage (in a locked cabinet within the alarmed room) and documentation.

1992 *If the drug is investigational (has an IND) or the device has an IDE or a claim of abbreviated IDE (non-*  
 1993 *significant risk device), include the following information:*

1994 31.3 *Identify the holder of the IND/IDE/Abbreviated IDE.*

1995 Response: N/A – Study medication is not investigational.

1996 31.4 *Explain procedures followed to comply with FDA sponsor requirements for the following:*

| <i>FDA Regulation</i> | <i>Applicable to:</i> |                    |                                |
|-----------------------|-----------------------|--------------------|--------------------------------|
|                       | <i>IND Studies</i>    | <i>IDE studies</i> | <i>Abbreviated IDE studies</i> |
| <i>21 CFR 11</i>      | <i>X</i>              | <i>X</i>           |                                |
| <i>21 CFR 54</i>      | <i>X</i>              | <i>X</i>           |                                |
| <i>21 CFR 210</i>     | <i>X</i>              |                    |                                |
| <i>21 CFR 211</i>     | <i>X</i>              |                    |                                |
| <i>21 CFR 312</i>     | <i>X</i>              |                    |                                |
| <i>21 CFR 812</i>     |                       | <i>X</i>           | <i>X</i>                       |
| <i>21 CFR 820</i>     |                       | <i>X</i>           |                                |

1997 Response: N/A – Study medication is not investigational.

1998 **32.0 Humanitarian Use Devices**

1999 **XX** N/A: This study does not involve humanitarian use devices. This does not apply.

2000 32.1 For Humanitarian Use Device (HUD) uses provide a description of the device, a summary of how  
 2001 you propose to use the device, including a description of any screening procedures, the HUD procedure,  
 2002 and any patient follow-up visits, tests or procedures.

2003 Response:

2004 32.2 For HUD uses provide a description of how the patient will be informed of the potential risks and  
 2005 benefits of the HUD and any procedures associated with its use.

2006 Response:

2007
