# Supplementary material for: Effect of Extending the Duration of Prequit Treatment With Varenicline on Smoking Abstinence: A Randomized Clinical Trial
Source: PubMed Central journal article supplement (PMC9652761; doi:10.1001/jamanetworkopen.2022.41731), 2022-11-11
Supplement: jamanetwopen-e2241731-s003.pdf [file jamanetwopen-e2241731-s003.pdf]

## Data Sharing Statement

Hawk, Jr. Effect of Extending the Duration of Prequit Treatment With Varenicline on Smoking Abstinence. *JAMA Netw Open*. Published November 11, 2022.

doi:10.1001/jamanetworkopen.2022.41731

### Data

**Data available:** Yes

**Data types:** Deidentified participant data, Data dictionary

**How to access data:** Data will be shared via the National Addiction and HIV Data Archive Program (<https://www.icpsr.umich.edu/web/pages/NAHDAP/index.html>).

**When available:** beginning date: 01-31-2023

### Supporting Documents

**Document types:** Informed consent form

**How to access documents:** By request to [lhawk@buffalo.edu](mailto:lhawk@buffalo.edu)

**When available:** With publication

### Additional Information

**Who can access the data:** Any, provided they meet the standard requirements of the National Addiction and HIV Data Archive Program

**Types of analyses:** Any

**Mechanisms of data availability:** Standard agreement with the National Addiction and HIV Data Archive Program
